# Supplementary material for: An Untargeted Metabolomics Approach for Correlating Pulse Crop Seed Coat Polyphenol Profiles with Antioxidant Capacity and Iron Chelation Ability
Source: MDPI journal article supplement (doi:10.3390/molecules26133833), 2021-06-23
Supplement: s1 [file s1]

## **Supplementary materials**

### **Procedures**

#### **Procedure S1: Liposome preparation**

Empty liposomes were prepared from soy phosphatidyl choline (PC) by dissolving 200 mg of PC in 50 mL of ethyl acetate to dissolve the lipid [75,76]. Ethyl acetate was evaporated in a rotary evaporator to get a uniform thin dried lipid layer, which was re-dissolved in 100 mL of warm water and sonicated for 1 h at 55°C to form unilamellar vesicles (liposomes, particle size measured by Malvern zetasizer was  $115 \pm 15$  nm). A volume of warm water (100 mL) was then added to the liposome solution bringing its final concentration to 1 mg/mL.

## Tables

**Table S1.** List of chemicals/reagents used in this study and their suppliers

| Chemical name                                                                  | Supplier                  |
|--------------------------------------------------------------------------------|---------------------------|
| 1,1,3,3-tetramethoxypropane                                                    | Sigma Aldrich, US         |
| 1-butanol                                                                      | Sigma Aldrich, US         |
| 2,4,6-Tripyridyl-S-triazine (TPTZ)                                             | Sigma Aldrich, US         |
| 2-thiobarbituric acid                                                          | Sigma Aldrich, US         |
| 4-(dimethylamino) cinnamaldehyde (DMAC)                                        | Sigma Aldrich, US         |
| Ammonium acetate                                                               | Sigma Aldrich, US         |
| Ascorbic acid                                                                  | Fisher Scientific, Canada |
| EDTA-Na <sub>2</sub>                                                           | Sigma Aldrich, US         |
| Ferric chloride hexahydrate                                                    | Sigma Aldrich, US         |
| Ferrozine                                                                      |                           |
| (3-(2-pyridyl)-5,6-diphenyl-1,2,4-triazine-4',4''-disulfonic acid sodium salt) | Sigma Aldrich, US         |
| Folin Ciocalteu reagent                                                        | Sigma Aldrich, US         |
| Gallic acid                                                                    | Sigma Aldrich, US         |
| Hydrochloric acid                                                              | EMD Serono, Canada        |
| Iron (II) sulfate heptahydrate                                                 | Sigma Aldrich, US         |
| Methanol                                                                       | Fisher Chemical, US       |
| Myricetin 3-O-glucoside                                                        | Extrasynthese, France     |
| Phospahtidyl choline (soy 95%)                                                 | Sigma Aldrich, US         |
| Procyanidin B1                                                                 | Sigma Aldrich, US         |
| Sodium acetate                                                                 | Sigma Aldrich, US         |
| Sodium carbonate                                                               | Sigma Aldrich, US         |
| Sodium dodecyl sulfate                                                         | Sigma Aldrich, US         |
| Sulfuric acid                                                                  | Fisher Scientific, Canada |
| Trichloroacetic acid (TCA)                                                     | Sigma Aldrich, US         |

**Table S2.** Antioxidant capacity measured for pulse seed coat extracts using four assays.

| Pulse crop                                     | Sample code | Seed coat color   | Antioxidant capacity        |                          |                           |                              |
|------------------------------------------------|-------------|-------------------|-----------------------------|--------------------------|---------------------------|------------------------------|
|                                                |             |                   | F-C assay**                 | DPPH assay (ARP)***      | FRAP****                  | TBARS*****                   |
| Chickpea<br>( <i>Cicer arietinum</i> L.)       | C1          | White*            | 2.84 ± 0.59 <sup>a</sup>    | 0.30 ± 0.04 <sup>a</sup> | 0.19 ± 0.01 <sup>a</sup>  | 0.020 ± 0.015 <sup>a</sup>   |
|                                                | C2          | Black             | 13.3 ± 0.2 <sup>d</sup>     | 156 ± 1 <sup>e</sup>     | 20.5 ± 0.2 <sup>g</sup>   | 0.20 ± 0.01 <sup>d</sup>     |
|                                                | C3          | Green             | 9.76 ± 0.79 <sup>b</sup>    | 111 ± 3 <sup>d</sup>     | 13.6 ± 0.4 <sup>f</sup>   | 0.16 ± 0.00 <sup>d</sup>     |
|                                                | C4          | Brown             | 11.9 ± 0.7 <sup>c,d</sup>   | 161 ± 9 <sup>e</sup>     | 18.4 ± 0.6 <sup>f,g</sup> | 0.17 ± 0.03 <sup>d</sup>     |
| Faba bean<br>( <i>Vicia faba</i> L.)           | F1          | White*            | 2.72 ± 0.31 <sup>a</sup>    | 11.0 ± 0.9 <sup>b</sup>  | 1.26 ± 0.01 <sup>c</sup>  | 0.05 ± 0.02 <sup>b</sup>     |
|                                                | F2          | Black             | 24.1 ± 0.3 <sup>e,f</sup>   | 522 ± 5 <sup>h</sup>     | 59.5 ± 1.0 <sup>i,j</sup> | 0.30 ± 0.01 <sup>e,f</sup>   |
|                                                | F3          | Green             | 23.1 ± 0.4 <sup>e</sup>     | 430 ± 4 <sup>g</sup>     | 56.1 ± 1.5 <sup>i</sup>   | 0.27 ± 0.00 <sup>e</sup>     |
|                                                | F4          | Beige             | 24.4 ± 0.8 <sup>f,g</sup>   | 510 ± 1 <sup>h</sup>     | 64.9 ± 2.5 <sup>j</sup>   | 0.35 ± 0.02 <sup>f</sup>     |
| Lentil<br>( <i>Lens culinaris</i> Medik.)      | L1          | Grey*             | 3.76 ± 1.08 <sup>a</sup>    | 13.9 ± 0.1 <sup>b</sup>  | 1.53 ± 0.00 <sup>d</sup>  | 0.077 ± 0.003 <sup>c</sup>   |
|                                                | L2          | Black             | 25.2 ± 0.1 <sup>g,h</sup>   | 962 ± 16 <sup>j</sup>    | 145 ± 5 <sup>m</sup>      | 0.66 ± 0.01 <sup>h</sup>     |
|                                                | L3          | Green             | 25.1 ± 0.3 <sup>f,g,h</sup> | 1136 ± 11 <sup>l</sup>   | 144 ± 2 <sup>m</sup>      | 0.66 ± 0.04 <sup>h</sup>     |
|                                                | L4          | Brown             | 24.8 ± 0.1 <sup>f,g,h</sup> | 1189 ± 9 <sup>m</sup>    | 157 ± 3 <sup>n</sup>      | 0.61 ± 0.03 <sup>h</sup>     |
| Pea<br>( <i>Pisum sativum</i> L.)              | P1          | White*            | 3.94 ± 0.70 <sup>a</sup>    | 2.90 ± 0.07 <sup>a</sup> | 0.95 ± 0.03 <sup>b</sup>  | 0.023 ± 0.003 <sup>a</sup>   |
|                                                | P2          | Maple (patterned) | 25.8 ± 0.1 <sup>h</sup>     | 880 ± 16 <sup>i</sup>    | 121 ± 4 <sup>l</sup>      | 0.50 ± 0.02 <sup>g</sup>     |
|                                                | P3          | Green marrowfat   | 4.35 ± 1.57 <sup>a</sup>    | 1.10 ± 0.05 <sup>a</sup> | 0.29 ± 0.01 <sup>a</sup>  | 0.007 ± 0.000 <sup>a</sup>   |
|                                                | P4          | Dun (brown)       | 25.4 ± 0.2 <sup>g,h</sup>   | 531 ± 3 <sup>h</sup>     | 78.8 ± 3.1 <sup>k</sup>   | 0.29 ± 0.05 <sup>e,f</sup>   |
| Common bean<br>( <i>Phaseolus vulgaris</i> L.) | B1          | White*            | 3.36 ± 0.16 <sup>a</sup>    | 0.40 ± 0.04 <sup>a</sup> | 0.03 ± 0.00 <sup>a</sup>  | 0.006 ± 0.001 <sup>a</sup>   |
|                                                | B2          | Black             | 25.4 ± 0.4 <sup>g,h</sup>   | 1091 ± 25 <sup>k</sup>   | 156 ± 3 <sup>n</sup>      | 0.73 ± 0.01 <sup>i</sup>     |
|                                                | B3          | Yellow            | 11.5 ± 0.4 <sup>b,c</sup>   | 51.0 ± 0.7 <sup>c</sup>  | 4.63 ± 0.19 <sup>e</sup>  | 0.069 ± 0.003 <sup>b,c</sup> |
|                                                | B4          | Pinto (patterned) | 23.8 ± 0.2 <sup>e</sup>     | 309 ± 5 <sup>f</sup>     | 32.5 ± 0.9 <sup>h</sup>   | 0.19 ± 0.02 <sup>d</sup>     |

\*Low tannin seed coats

\*\*F-C: Folin Ciocalteu assay; F-C was estimated as mg gallic acid equivalent/g dry weight of seed coat

\*\*\*ARP: antiradical power; APR is the reciprocal of IC<sub>50</sub>. All values were multiplied by 10<sup>-3</sup> for simplicity

\*\*\*\*FRAP: Ferric reducing antioxidant power was estimated as mg myricetin 3-O-glucoside equivalent/g dry weight of seed coat

\*\*\*\*\*TBARS: Thiobarbituric acid reactive substances assay was estimated as the reciprocal of IC<sub>50</sub> values. Results were expressed as mean ± SD.

All concentrations were calculated based on dry weight. Means with different superscript letters for each assay are significantly different ( $p < 0.05$ ).

**Table S3.** Proanthocyanidin content and iron chelation ability of pulse seed coat extracts

| Pulse crop                                     | Sample code | Seed coat color   | Proanthocyanidin content** | Iron chelation ability*** |
|------------------------------------------------|-------------|-------------------|----------------------------|---------------------------|
| Chickpea<br>( <i>Cicer arietinum</i> L.)       | C1          | White*            | 0.01 ± 0.00 <sup>a</sup>   | 0.10 ± 0.01 <sup>a</sup>  |
|                                                | C2          | Black             | 6.16 ± 0.06 <sup>c</sup>   | 21.8 ± 0.5 <sup>f</sup>   |
|                                                | C3          | Green             | 9.70 ± 0.06 <sup>d</sup>   | 15.8 ± 0.3 <sup>e</sup>   |
|                                                | C4          | Brown             | 10.2 ± 0.1 <sup>d</sup>    | 19.7 ± 0.1 <sup>e,f</sup> |
| Faba bean<br>( <i>Vicia faba</i> L.)           | F1          | White*            | 0.01 ± 0.00 <sup>a</sup>   | 0.23 ± 0.01 <sup>b</sup>  |
|                                                | F2          | Black             | 24.5 ± 0.7 <sup>e</sup>    | 45.7 ± 0.8 <sup>g</sup>   |
|                                                | F3          | Green             | 34.7 ± 0.6 <sup>f</sup>    | 43.0 ± 3.2 <sup>g</sup>   |
|                                                | F4          | Beige             | 40.4 ± 0.7 <sup>g</sup>    | 45.2 ± 0.7 <sup>g</sup>   |
| Lentil<br>( <i>Lens culinaris</i> Medik.)      | L1          | Grey*             | 0.53 ± 0.01 <sup>b</sup>   | 0.86 ± 0.02 <sup>c</sup>  |
|                                                | L2          | Black             | 70.3 ± 2.8 <sup>i</sup>    | 89.2 ± 4.7 <sup>i</sup>   |
|                                                | L3          | Green             | 76.8 ± 1.0 <sup>k</sup>    | 89.1 ± 0.8 <sup>i</sup>   |
|                                                | L4          | Brown             | 75.6 ± 0.6 <sup>j,k</sup>  | 91.3 ± 1.3 <sup>i</sup>   |
| Pea<br>( <i>Pisum sativum</i> L.)              | P1          | White*            | 0.00 ± 0.00 <sup>a</sup>   | 0.10 ± 0.00 <sup>a</sup>  |
|                                                | P2          | Maple (patterned) | 55.1 ± 0.3 <sup>h</sup>    | 110 ± 4 <sup>j</sup>      |
|                                                | P3          | Green marrowfat   | 0.00 ± 0.00 <sup>a</sup>   | 0.06 ± 0.03 <sup>a</sup>  |
|                                                | P4          | Dun (brown)       | 34.7 ± 0.2 <sup>f</sup>    | 81.1 ± 4.4 <sup>h</sup>   |
| Common bean<br>( <i>Phaseolus vulgaris</i> L.) | B1          | White*            | 0.01 ± 0.00 <sup>a</sup>   | 0.08 ± 0.01 <sup>a</sup>  |
|                                                | B2          | Black             | 72.8 ± 0.5 <sup>i,j</sup>  | 116 ± 1 <sup>j</sup>      |
|                                                | B3          | Yellow            | 5.99 ± 0.06 <sup>c</sup>   | 2.12 ± 0.02 <sup>d</sup>  |
|                                                | B4          | Pinto (patterned) | 32.3 ± 0.5 <sup>f</sup>    | 15.0 ± 0.4 <sup>e</sup>   |

\*Low tannin seed coats

\*\*Proanthocyanidin content was estimated by DMAC assay as mg procyanidin B<sub>1</sub> equivalent/g dry weight of seed coat

\*\*\*Iron chelation ability was estimated by Ferrozine assay as mg EDTA equivalent/g dry weight of seed coat

All concentrations were calculated based on dry weight. Means with different superscript letters for each assay are significantly different ( $p < 0.05$ )

**Table S4.** Concentrations of polyphenols in common bean seed coat extracts ( $\mu\text{mol/g}$  dry weight)

| Compound                            | B1              | B2              | B3              | B4              |
|-------------------------------------|-----------------|-----------------|-----------------|-----------------|
|                                     | Mean $\pm$ SD   | Mean $\pm$ SD   | Mean $\pm$ SD   | Mean $\pm$ SD   |
| Pelargonidin 3-O-glucoside          | ND $\pm$ ND     | 1.75 $\pm$ 0.23 | ND $\pm$ ND     | ND $\pm$ ND     |
| Cyanidin 3,5-di-O-glucoside         | ND $\pm$ ND     | 13.8 $\pm$ 0.8  | ND $\pm$ ND     | ND $\pm$ ND     |
| Delphinidin 3,5-di-O-glucoside      | ND $\pm$ ND     | 198 $\pm$ 31    | ND $\pm$ ND     | ND $\pm$ ND     |
| Delphinidin 3-O-rhamnoside          | ND $\pm$ ND     | 1.73 $\pm$ 0.23 | ND $\pm$ ND     | ND $\pm$ ND     |
| Delphinidin 3- $\beta$ -D-Glucoside | ND $\pm$ ND     | 4873 $\pm$ 1509 | ND $\pm$ ND     | ND $\pm$ ND     |
| Cyanindin 3-O-glucoside             | ND $\pm$ ND     | 51.1 $\pm$ 3.2  | ND $\pm$ ND     | ND $\pm$ ND     |
| Malvidin 3,5-di-O-glucoside         | ND $\pm$ ND     | 305 $\pm$ 21    | ND $\pm$ ND     | ND $\pm$ ND     |
| Malvidin 3-O-galactoside            | ND $\pm$ ND     | 15.2 $\pm$ 1.5  | ND $\pm$ ND     | ND $\pm$ ND     |
| Malvidin 3-O-glucoside              | ND $\pm$ ND     | 405 $\pm$ 25    | ND $\pm$ ND     | ND $\pm$ ND     |
| Peonidin 3,5-di-O-glucoside         | ND $\pm$ ND     | 1.13 $\pm$ 0.08 | ND $\pm$ ND     | ND $\pm$ ND     |
| Peonidin 3-O-glucoside              | ND $\pm$ ND     | 3.90 $\pm$ 0.64 | ND $\pm$ ND     | ND $\pm$ ND     |
| Anthocyanins                        | ND $\pm$ ND     | 5870 $\pm$ 1592 | ND $\pm$ ND     | ND $\pm$ ND     |
| Chalcones                           | ND $\pm$ ND     | ND $\pm$ ND     | ND $\pm$ ND     | ND $\pm$ ND     |
| Dihydromyricetin                    | ND $\pm$ ND     | 151 $\pm$ 12    | ND $\pm$ ND     | ND $\pm$ ND     |
| Dihydrokaempferol                   | ND $\pm$ ND     | 6.35 $\pm$ 0.37 | 15.0 $\pm$ 1.5  | 2.27 $\pm$ 0.36 |
| Taxifolin (dihydroquercetin)        | ND $\pm$ ND     | 14.2 $\pm$ 0.7  | 7.42 $\pm$ 0.74 | 1.37 $\pm$ 0.05 |
| Dihydroflavonols                    | ND $\pm$ ND     | 172 $\pm$ 13    | 22.4 $\pm$ 2.3  | 3.64 $\pm$ 0.41 |
| Luteolin 3',7-di-O-glucoside        | ND $\pm$ ND     | ND $\pm$ ND     | 0.40 $\pm$ 0.10 | ND $\pm$ ND     |
| Flavones                            | ND $\pm$ ND     | ND $\pm$ ND     | 0.40 $\pm$ 0.10 | ND $\pm$ ND     |
| Kaempferol                          | ND $\pm$ ND     | 9.62 $\pm$ 1.92 | 280 $\pm$ 48    | 60.1 $\pm$ 17.8 |
| Kaempferol 3-O-D-galactoside        | ND $\pm$ ND     | ND $\pm$ ND     | 0.96 $\pm$ 0.26 | ND $\pm$ ND     |
| Kaempferol 3-O-glucoside            | 0.75 $\pm$ 0.10 | 837 $\pm$ 64    | 8877 $\pm$ 472  | 1892 $\pm$ 158  |
| Kaempferol 3-O-rutinoside           | 0.31 $\pm$ 0.08 | 1.06 $\pm$ 0.60 | ND $\pm$ ND     | 0.17 $\pm$ 0.02 |

|                                            |             |             |             |             |
|--------------------------------------------|-------------|-------------|-------------|-------------|
| Kaempferol 7-O-glucoside                   | ND ± ND     | 0.57 ± 0.13 | 23.3 ± 7.2  | 3.79 ± 0.31 |
| Kaempferol di-rutinoside                   | 0.24 ± 0.03 | 1.53 ± 0.45 | 0.30 ± 0.08 | 0.18 ± 0.02 |
| Myricetin                                  | ND ± ND     | 82.5 ± 23.4 | ND ± ND     | ND ± ND     |
| Quercetin                                  | ND ± ND     | 14.5 ± 3.0  | 21.2 ± 4.8  | 0.75 ± 0.14 |
| Quercetin 3,4'-di-O-glucoside              | ND ± ND     | 0.77 ± 0.05 | 1.55 ± 0.27 | ND ± ND     |
| Quercetin 3-O-glucoside<br>(Isoquercetrin) | ND ± ND     | 287 ± 29    | 455 ± 23    | 7.95 ± 0.92 |
| Quercetin 3-O-rutinoside(Rutin)            | ND ± ND     | 0.99 ± 0.13 | ND ± ND     | 0.15 ± 0.04 |
| Quercetin 4'-O-glucoside<br>(Spiraeoside)  | ND ± ND     | 0.33 ± 0.05 | 15.8 ± 4.5  | ND ± ND     |
| Flavonols                                  | 1.30 ± 0.21 | 1236 ± 123  | 9675 ± 560  | 1965 ± 177  |
| (+)-Catechin                               | ND ± ND     | 923 ± 35    | 567 ± 28    | 1632 ± 100  |
| catechin-glucoside                         | ND ± ND     | 3.21 ± 0.36 | 14.6 ± 2.0  | 5.41 ± 0.47 |
| (-)-Epicatechin                            | ND ± ND     | 45.0 ± 2.3  | 88.2 ± 16.0 | 75.6 ± 4.1  |
| (-)-Epigallocatechin                       | ND ± ND     | 114 ± 11    | ND ± ND     | ND ± ND     |
| (-)-Gallocatechin                          | ND ± ND     | 1032 ± 160  | ND ± ND     | ND ± ND     |
| Flavan-3-ols                               | ND ± ND     | 2117 ± 208  | 670 ± 46    | 1713 ± 104  |
| Eriodictyol                                | ND ± ND     | 1.16 ± 0.14 | ND ± ND     | ND ± ND     |
| Naringenin                                 | ND ± ND     | 1.71 ± 0.30 | 0.38 ± 0.03 | 0.88 ± 0.42 |
| Flavanones                                 | ND ± ND     | 2.87 ± 0.44 | 0.38 ± 0.03 | 0.88 ± 0.42 |
| 3,4-Dihydroxybenzoic acid                  | 0.68 ± 0.08 | 6.62 ± 0.28 | 5.98 ± 0.33 | 6.14 ± 1.65 |
| 4-hydroxybenzoic acid                      | ND ± ND     | ND ± ND     | 82.2 ± 7.4  | ND ± ND     |
| Gallic acid                                | ND ± ND     | 71.4 ± 5.7  | ND ± ND     | ND ± ND     |
| Vanillic acid-4-β-D-glucoside              | 3.70 ± 0.59 | 191 ± 15    | 86.1 ± 5.1  | 51.9 ± 4.0  |
| Hydroxybenzoic acids                       | 4.38 ± 0.67 | 269 ± 21    | 174 ± 13    | 58.0 ± 5.6  |
| Caffeic acid                               | ND ± ND     | ND ± ND     | 12.2 ± 0.1  | 0.64 ± 0.28 |
| Chlorogenic acid                           | ND ± ND     | 18.8 ± 2.3  | 45.0 ± 9.3  | 153 ± 29    |
| Ferulic acid (trans)                       | ND ± ND     | 288 ± 84    | 23.9 ± 5.8  | 95.1 ± 18.5 |
| p-Coumaric acid (trans)                    | ND ± ND     | ND ± ND     | 19.4 ± 2.0  | ND ± ND     |

|                                              |         |             |             |             |
|----------------------------------------------|---------|-------------|-------------|-------------|
| Hydroxycinnamic acids                        | ND ± ND | 307 ± 86    | 101 ± 17    | 249 ± 48    |
| Hydroxycoumarins                             | ND ± ND | ND ± ND     | ND ± ND     | ND ± ND     |
| Genistein                                    | ND ± ND | ND ± ND     | 0.48 ± 0.12 | ND ± ND     |
| Isoflavones                                  | ND ± ND | ND ± ND     | 0.48 ± 0.12 | ND ± ND     |
| Procyanidin B1                               | ND ± ND | 454 ± 57    | 239 ± 25    | 952 ± 100   |
| Procyanidin B3                               | ND ± ND | 49.7 ± 5.5  | 22.1 ± 1.2  | 180 ± 27    |
| Procyanidin C1                               | ND ± ND | 70.7 ± 8.9  | 94.7 ± 6.8  | 616 ± 98    |
| Procyanidins                                 | ND ± ND | 574 ± 71    | 356 ± 33    | 1748 ± 225  |
| Resveratrol 3-β-mono-D-glucoside (Polydatin) | ND ± ND | 0.43 ± 0.11 | ND ± ND     | 0.32 ± 0.05 |
| Stilbenes                                    | ND ± ND | 0.43 ± 0.11 | ND ± ND     | 0.32 ± 0.05 |

**Table S5.** Concentrations of polyphenols in lentil seed coat extracts ( $\mu\text{mol/g}$  dry weight)

| Compound                                           | L1              | L2              | L3              | L4              |
|----------------------------------------------------|-----------------|-----------------|-----------------|-----------------|
|                                                    | Mean $\pm$ SD   | Mean $\pm$ SD   | Mean $\pm$ SD   | Mean $\pm$ SD   |
| Delphinidin 3-O-rhamnoside                         | ND $\pm$ ND     | 1.23 $\pm$ 0.38 | ND $\pm$ ND     | ND $\pm$ ND     |
| Anthocyanins                                       | ND $\pm$ ND     | 1.23 $\pm$ 0.38 | ND $\pm$ ND     | ND $\pm$ ND     |
| Chalcones                                          | ND $\pm$ ND     | ND $\pm$ ND     | ND $\pm$ ND     | ND $\pm$ ND     |
| Dihydromyricetin                                   | ND $\pm$ ND     | 4.95 $\pm$ 0.42 | 5.15 $\pm$ 0.57 | 2.31 $\pm$ 0.21 |
| Dihydrokaempferol                                  | 2.52 $\pm$ 0.50 | 0.38 $\pm$ 0.05 | 0.39 $\pm$ 0.05 | 0.32 $\pm$ 0.04 |
| Taxifolin (dihydroquercetin)                       | 0.83 $\pm$ 0.19 | 2.52 $\pm$ 0.24 | 2.81 $\pm$ 0.12 | 1.66 $\pm$ 0.24 |
| Dihydroflavonols                                   | 3.35 $\pm$ 0.69 | 7.85 $\pm$ 0.71 | 8.35 $\pm$ 0.74 | 4.29 $\pm$ 0.49 |
| Apigenin                                           | 0.71 $\pm$ 0.14 | 1.88 $\pm$ 0.38 | ND $\pm$ ND     | 0.42 $\pm$ 0.10 |
| Diosmetin                                          | ND $\pm$ ND     | 1.21 $\pm$ 0.20 | 0.36 $\pm$ 0.01 | ND $\pm$ ND     |
| Luteolin                                           | 0.48 $\pm$ 0.08 | 264 $\pm$ 39    | 39.8 $\pm$ 8.2  | 13.6 $\pm$ 1.6  |
| Luteolin 4'-O-glucoside                            | 0.59 $\pm$ 0.23 | 323 $\pm$ 25    | 50.1 $\pm$ 2.2  | 39.5 $\pm$ 4.5  |
| Luteolin 7-O-glucoside                             | ND $\pm$ ND     | 3.71 $\pm$ 0.38 | 0.47 $\pm$ 0.10 | ND $\pm$ ND     |
| Flavones                                           | 1.78 $\pm$ 0.45 | 594 $\pm$ 64    | 90.7 $\pm$ 10.6 | 53.5 $\pm$ 6.2  |
| Kaempferol 3-O-rhamnoside                          | 1.57 $\pm$ 0.36 | 4.45 $\pm$ 0.47 | 4.13 $\pm$ 0.49 | 8.01 $\pm$ 0.31 |
| Fisetin                                            | 0.87 $\pm$ 0.28 | 1.03 $\pm$ 0.32 | ND $\pm$ ND     | ND $\pm$ ND     |
| Kaempferol 3-O-robinoside-7-O-rhamnoside (robinin) | 37.7 $\pm$ 8.1  | 21.3 $\pm$ 2.2  | 85.8 $\pm$ 8.0  | 23.8 $\pm$ 4.1  |
| Kaempferol 7-O-glucoside                           | ND $\pm$ ND     | 0.60 $\pm$ 0.08 | 0.31 $\pm$ 0.04 | ND $\pm$ ND     |
| Kaempferol dirutinoside                            | 394 $\pm$ 83    | 200 $\pm$ 8     | 386 $\pm$ 49    | 243 $\pm$ 28    |
| Myricetin                                          | ND $\pm$ ND     | 20.1 $\pm$ 3.4  | 9.14 $\pm$ 2.59 | 6.13 $\pm$ 0.69 |
| Myricetin 3-O-rhamnoside                           | ND $\pm$ ND     | 20.1 $\pm$ 3.3  | 8.59 $\pm$ 1.97 | 5.89 $\pm$ 0.66 |
| Quercetin                                          | ND $\pm$ ND     | 3.13 $\pm$ 0.75 | 1.18 $\pm$ 0.09 | 0.93 $\pm$ 0.18 |
| Quercetin 3-O-glucoside (Isoquercetrin)            | ND $\pm$ ND     | 0.29 $\pm$ 0.09 | 0.35 $\pm$ 0.03 | 0.34 $\pm$ 0.01 |



|                                       |             |             |             |             |
|---------------------------------------|-------------|-------------|-------------|-------------|
| Quercetin 3-O-rhamnoside (Quercitrin) | 0.38 ± 0.07 | 12.5 ± 1.0  | 10.4 ± 0.8  | 10.0 ± 0.3  |
| Quercetin 3-O-rutinoside(Rutin)       | ND ± ND     | 0.88 ± 0.07 | 1.12 ± 0.17 | 0.80 ± 0.08 |
| Flavonols                             | 435 ± 92    | 284 ± 20    | 507 ± 63    | 299 ± 34    |
| (+)-Catechin                          | 2.03 ± 0.30 | 195 ± 12    | 360 ± 24    | 157 ± 15    |
| catechin-glucoside                    | 141 ± 24    | 2561 ± 275  | 6763 ± 1314 | 2787 ± 369  |
| (-)-Epicatechin                       | ND ± ND     | 5.17 ± 0.27 | 8.73 ± 1.09 | 3.82 ± 0.97 |
| (-)-Epigallocatechin                  | 1.10 ± 0.20 | 5.65 ± 0.38 | 4.83 ± 0.59 | 2.82 ± 0.27 |
| (-)-Gallocatechin                     | 0.72 ± 0.05 | 53.4 ± 7.2  | 314 ± 39    | 111 ± 6     |
| Flavan-3-ols                          | 145 ± 24    | 2820 ± 295  | 7451 ± 1378 | 3062 ± 391  |
| Eriodictyol                           | ND ± ND     | 0.60 ± 0.08 | 1.12 ± 0.23 | 0.57 ± 0.08 |
| Naringenin                            | ND ± ND     | 0.65 ± 0.10 | 0.80 ± 0.11 | 0.91 ± 0.10 |
| Flavanones                            | ND ± ND     | 1.25 ± 0.18 | 1.92 ± 0.34 | 1.48 ± 0.18 |
| 3,4-Dihydroxybenzoic acid             | 9.09 ± 0.95 | 16.1 ± 0.6  | 4.53 ± 0.98 | 5.91 ± 0.89 |
| Gallic acid                           | ND ± ND     | 99.5 ± 10.4 | 6.75 ± 1.72 | 4.21 ± 0.50 |
| Vanillic acid 4-β-D-glucoside         | 587 ± 89    | 63.2 ± 5.5  | 293 ± 30    | 279 ± 16    |
| Vanillin                              | 0.93 ± 0.81 | ND ± ND     | ND ± ND     | ND ± ND     |
| Hydroxybenzoic acids                  | 597 ± 90    | 179 ± 17    | 304 ± 33    | 289 ± 17    |
| Caffeic acid                          | 1.70 ± 0.13 | 0.63 ± 0.16 | 0.83 ± 0.35 | 1.47 ± 0.52 |
| Chlorogenic acid                      | ND ± ND     | ND ± ND     | 5.48 ± 1.53 | 3.50 ± 1.00 |
| p-Coumaric acid (trans)               | 12.5 ± 1.8  | 14.2 ± 3.8  | 29.0 ± 6.5  | 14.7 ± 0.9  |
| Hydroxycinnamic acids                 | 14.2 ± 1.9  | 14.8 ± 3.9  | 35.3 ± 8.4  | 19.7 ± 2.4  |
| Hydroxycoumarins                      | ND ± ND     | ND ± ND     | ND ± ND     | ND ± ND     |
| Isoflavones                           | ND ± ND     | ND ± ND     | ND ± ND     | ND ± ND     |
| Procyanidin B1                        | 1.38 ± 0.04 | 200 ± 21    | 162 ± 21    | 186 ± 19    |
| Procyanidin B3                        | 14.6 ± 1.3  | 1150 ± 91   | 1401 ± 80   | 1058 ± 76   |
| Procyanidin C1                        | 6.55 ± 1.05 | 512 ± 40    | 606 ± 74    | 554 ± 33    |
| Procyanidins                          | 22.5 ± 2.3  | 1862 ± 152  | 2169 ± 175  | 1798 ± 128  |

|                                                         |                 |                |                |                |
|---------------------------------------------------------|-----------------|----------------|----------------|----------------|
| Resveratrol 3- $\beta$ -mono-D-glucoside<br>(Polydatin) | 0.78 $\pm$ 0.04 | 21.2 $\pm$ 1.4 | 21.8 $\pm$ 3.8 | 16.8 $\pm$ 0.3 |
| Stilbenes                                               | 0.78 $\pm$ 0.04 | 21.2 $\pm$ 1.4 | 21.8 $\pm$ 3.8 | 16.8 $\pm$ 0.3 |

**Table S6.** Concentrations of polyphenols in pea seed coat extracts ( $\mu\text{mol/g}$  dry weight)

| Compound                                | P1              | P2              | P3              | P4              |
|-----------------------------------------|-----------------|-----------------|-----------------|-----------------|
|                                         | Mean $\pm$ SD   | Mean $\pm$ SD   | Mean $\pm$ SD   | Mean $\pm$ SD   |
| Anthocyanins                            | ND $\pm$ ND     | ND $\pm$ ND     | ND $\pm$ ND     | ND $\pm$ ND     |
| Chalcones                               | ND $\pm$ ND     | ND $\pm$ ND     | ND $\pm$ ND     | ND $\pm$ ND     |
| Dihydromyricetin                        | 1.39 $\pm$ 0.16 | 18.8 $\pm$ 3.9  | 0.38 $\pm$ 0.03 | 30.7 $\pm$ 2.8  |
| Dihydrokaempferol                       | ND $\pm$ ND     | 0.53 $\pm$ 0.17 | 2.53 $\pm$ 0.29 | 0.75 $\pm$ 0.05 |
| Taxifolin (dihydroquercetin)            | 4.31 $\pm$ 1.30 | 2.26 $\pm$ 0.50 | 1.64 $\pm$ 0.37 | 9.83 $\pm$ 0.95 |
| Dihydroflavonols                        | 5.70 $\pm$ 1.46 | 21.6 $\pm$ 4.6  | 4.55 $\pm$ 0.69 | 41.3 $\pm$ 3.8  |
| Vitexin                                 | ND $\pm$ ND     | 131 $\pm$ 14    | ND $\pm$ ND     | 44.5 $\pm$ 4.0  |
| Luteolin                                | ND $\pm$ ND     | 5.98 $\pm$ 0.72 | ND $\pm$ ND     | 8.45 $\pm$ 1.14 |
| Luteolin 7-O-glucoside                  | ND $\pm$ ND     | 1.62 $\pm$ 0.21 | ND $\pm$ ND     | 1.23 $\pm$ 0.13 |
| Luteolin 8'-C-glucoside                 | ND $\pm$ ND     | 61.6 $\pm$ 17.4 | ND $\pm$ ND     | 32.9 $\pm$ 9.4  |
| Flavones                                | ND $\pm$ ND     | 200 $\pm$ 32    | ND $\pm$ ND     | 87.1 $\pm$ 14.6 |
| Kaempferol 3-O-rhamnoside               | ND $\pm$ ND     | 3.97 $\pm$ 0.18 | ND $\pm$ ND     | 5.45 $\pm$ 0.57 |
| Kaempferol 3-O-rutinoside-4'-glucoside  | 0.22 $\pm$ 0.06 | ND $\pm$ ND     | ND $\pm$ ND     | ND $\pm$ ND     |
| Kaempferol 3-O-glucoside                | 1.47 $\pm$ 0.18 | 2.24 $\pm$ 0.61 | 6.21 $\pm$ 1.07 | 2.77 $\pm$ 0.59 |
| Kaempferol 7-O-glucoside                | ND $\pm$ ND     | 0.58 $\pm$ 0.10 | ND $\pm$ ND     | 0.57 $\pm$ 0.08 |
| Myricetin                               | ND $\pm$ ND     | 15.6 $\pm$ 1.5  | ND $\pm$ ND     | 15.5 $\pm$ 3.7  |
| Myricetin 3-O-rhamnoside                | ND $\pm$ ND     | 80.3 $\pm$ 15.3 | ND $\pm$ ND     | 92.4 $\pm$ 11.0 |
| Quercetin                               | 0.73 $\pm$ 0.05 | 0.36 $\pm$ 0.04 | 0.94 $\pm$ 0.56 | 0.91 $\pm$ 0.14 |
| Quercetin 3-O-glucoside (Isoquercetrin) | 0.33 $\pm$ 0.01 | ND $\pm$ ND     | ND $\pm$ ND     | 0.41 $\pm$ 0.04 |
| Quercetin 3-O-rhamnoside (Quercitrin)   | ND $\pm$ ND     | 9.16 $\pm$ 0.49 | ND $\pm$ ND     | 21.0 $\pm$ 2.0  |
| Flavonols                               | 2.87 $\pm$ 0.33 | 112 $\pm$ 18    | 7.15 $\pm$ 1.63 | 139 $\pm$ 18    |
| (+)-Catechin                            | ND $\pm$ ND     | 1.33 $\pm$ 0.30 | ND $\pm$ ND     | 1.36 $\pm$ 0.24 |
| (-)-Epicatechin                         | ND $\pm$ ND     | 3.46 $\pm$ 0.40 | ND $\pm$ ND     | 10.7 $\pm$ 0.6  |

|                                              |             |             |             |             |
|----------------------------------------------|-------------|-------------|-------------|-------------|
| (-)-Epigallocatechin                         | ND ± ND     | 847 ± 175   | ND ± ND     | 994 ± 169   |
| (-)-Galocatechin                             | ND ± ND     | 179 ± 40    | ND ± ND     | 76.9 ± 12.9 |
| Flavan-3-ols                                 | ND ± ND     | 1031 ± 216  | ND ± ND     | 1083 ± 183  |
| Eriodictyol                                  | ND ± ND     | 1.08 ± 0.16 | ND ± ND     | 2.61 ± 0.24 |
| Naringenin                                   | ND ± ND     | 3.78 ± 0.28 | 3.06 ± 0.05 | 3.59 ± 0.40 |
| Flavanones                                   | ND ± ND     | 4.86 ± 0.44 | 3.06 ± 0.05 | 6.20 ± 0.64 |
| 3,4-Dihydroxybenzoic acid                    | 75.7 ± 10.7 | 181 ± 32    | 17.9 ± 4.6  | 530 ± 82    |
| 4-hydroxybenzoic acid                        | ND ± ND     | 255 ± 53    | ND ± ND     | 142 ± 16    |
| Gallic acid                                  | ND ± ND     | 35.9 ± 7.3  | ND ± ND     | 121 ± 26    |
| Vanillic acid                                | 68.7 ± 20.7 | 468 ± 98    | 122 ± 19    | 104 ± 6     |
| Vanillic acid 4-β-D-glucoside                | 16.6 ± 1.1  | 132 ± 15    | 9.01 ± 1.52 | 76.5 ± 23.7 |
| Vanillin                                     | 9.17 ± 2.44 | ND ± ND     | ND ± ND     | ND ± ND     |
| Hydroxybenzoic acids                         | 170 ± 35    | 1072 ± 206  | 149 ± 26    | 974 ± 154   |
| Caffeic acid                                 | 2.42 ± 0.32 | 1.79 ± 0.09 | ND ± ND     | 8.22 ± 1.42 |
| Ferulic acid (trans)                         | 22.6 ± 0.9  | 85.9 ± 6.6  | 8.12 ± 2.43 | 6.95 ± 0.22 |
| Hydroxycinnamic acids                        | 25.0 ± 1.2  | 87.7 ± 6.6  | 8.12 ± 2.43 | 15.2 ± 1.6  |
| Hydroxycoumarins                             | ND ± ND     | ND ± ND     | ND ± ND     | ND ± ND     |
| Genistein                                    | ND ± ND     | ND ± ND     | ND ± ND     | 1.10 ± 0.12 |
| Prunetin                                     | 2.23 ± 0.81 | 6.18 ± 1.16 | 19.7 ± 2.6  | ND ± ND     |
| Isoflavones                                  | 2.23 ± 0.81 | 6.18 ± 1.16 | 19.7 ± 2.6  | 1.10 ± 0.12 |
| Procyanidins                                 | ND ± ND     | ND ± ND     | ND ± ND     | ND ± ND     |
| Resveratrol 3-β-mono-D-glucoside (Polydatin) | ND ± ND     | 2.27 ± 0.21 | ND ± ND     | 9.75 ± 0.99 |
| Stilbenes                                    | ND ± ND     | 2.27 ± 0.21 | ND ± ND     | 9.75 ± 0.99 |

**Table S7.** Concentrations of polyphenols in chickpea seed coat extracts ( $\mu\text{mol/g}$  dry weight)

| Compound                                | C1              | C2              | C3              | C4              |
|-----------------------------------------|-----------------|-----------------|-----------------|-----------------|
|                                         | Mean $\pm$ SD   | Mean $\pm$ SD   | Mean $\pm$ SD   | Mean $\pm$ SD   |
| Anthocyanins                            | ND $\pm$ ND     | ND $\pm$ ND     | ND $\pm$ ND     | ND $\pm$ ND     |
| Chalcones                               | ND $\pm$ ND     | ND $\pm$ ND     | ND $\pm$ ND     | ND $\pm$ ND     |
| Dihydromyricetin                        | ND $\pm$ ND     | 8.74 $\pm$ 1.88 | 7.41 $\pm$ 0.52 | 7.40 $\pm$ 1.30 |
| Dihydrokaempferol                       | ND $\pm$ ND     | ND $\pm$ ND     | 0.75 $\pm$ 0.08 | ND $\pm$ ND     |
| Taxifolin (dihydroquercetin)            | ND $\pm$ ND     | 0.67 $\pm$ 0.08 | 1.49 $\pm$ 0.19 | 0.68 $\pm$ 0.16 |
| Dihydroflavonols                        | ND $\pm$ ND     | 9.41 $\pm$ 1.96 | 9.65 $\pm$ 0.79 | 8.08 $\pm$ 1.46 |
| Apigenin                                | 0.81 $\pm$ 0.22 | ND $\pm$ ND     | ND $\pm$ ND     | ND $\pm$ ND     |
| Luteolin                                | 0.54 $\pm$ 0.24 | 0.59 $\pm$ 0.13 | 0.87 $\pm$ 0.17 | 0.90 $\pm$ 0.48 |
| Flavones                                | 1.35 $\pm$ 0.46 | 0.59 $\pm$ 0.13 | 0.87 $\pm$ 0.17 | 0.90 $\pm$ 0.48 |
| Kaempferol 3-O-rhamnoside               | ND $\pm$ ND     | 0.26 $\pm$ 0.06 | 0.76 $\pm$ 0.13 | 0.34 $\pm$ 0.09 |
| Isorhamnetin                            | 0.90 $\pm$ 0.10 | 3.22 $\pm$ 0.41 | 4.93 $\pm$ 0.98 | 5.89 $\pm$ 0.88 |
| Kaempferol                              | 1.08 $\pm$ 0.22 | 1.35 $\pm$ 0.17 | 2.76 $\pm$ 0.47 | 4.61 $\pm$ 1.36 |
| Kaempferol 3-O-D-galactoside            | ND $\pm$ ND     | 0.30 $\pm$ 0.09 | 1.10 $\pm$ 0.08 | 0.61 $\pm$ 0.11 |
| Kaempferol 3-O-glucoside                | 65.9 $\pm$ 19.5 | 12.9 $\pm$ 2.2  | 40.6 $\pm$ 5.5  | 24.2 $\pm$ 9.0  |
| Kaempferol 3-O-rutinoside               | 0.59 $\pm$ 0.04 | 68.3 $\pm$ 18.4 | 117 $\pm$ 6     | 48.0 $\pm$ 8.4  |
| Kaempferol di-rutinoside                | 0.19 $\pm$ 0.01 | ND $\pm$ ND     | ND $\pm$ ND     | ND $\pm$ ND     |
| Myricetin                               | ND $\pm$ ND     | 34.5 $\pm$ 8.5  | 28.7 $\pm$ 5.3  | 32.8 $\pm$ 8.4  |
| Myricetin 3-O-rhamnoside                | ND $\pm$ ND     | 2.39 $\pm$ 0.44 | 3.81 $\pm$ 0.68 | 1.36 $\pm$ 0.24 |
| Quercetin                               | 0.89 $\pm$ 0.40 | 4.59 $\pm$ 0.78 | 10.5 $\pm$ 1.7  | 10.0 $\pm$ 1.8  |
| Quercetin 3-O-galactoside               | 1.29 $\pm$ 0.21 | 1.43 $\pm$ 0.31 | 3.34 $\pm$ 0.65 | 2.19 $\pm$ 0.34 |
| Quercetin 3-O-glucoside (Isoquercitrin) | 3.66 $\pm$ 0.49 | 1.60 $\pm$ 0.54 | 4.32 $\pm$ 0.41 | 1.82 $\pm$ 0.18 |
| Quercetin 3-O-rhamnoside (Quercitrin)   | ND $\pm$ ND     | 0.49 $\pm$ 0.08 | 1.30 $\pm$ 0.21 | 0.53 $\pm$ 0.05 |

|                                 |             |             |             |             |
|---------------------------------|-------------|-------------|-------------|-------------|
| Quercetin 3-O-rutinoside(Rutin) | 1.27 ± 0.18 | 159 ± 45    | 281 ± 20    | 149 ± 34    |
| Flavonols                       | 75.8 ± 21.2 | 290 ± 77    | 500 ± 42    | 281 ± 64    |
| (-)-Epigallocatechin            | ND ± ND     | 4.03 ± 0.24 | 9.22 ± 0.69 | 6.76 ± 0.91 |
| (-)-Galocatechin                | ND ± ND     | 63.1 ± 9.9  | 113 ± 2     | 105 ± 15    |
| Flavan-3-ols                    | ND ± ND     | 67.1 ± 10.2 | 122 ± 3     | 112 ± 16    |
| Naringenin                      | 0.41 ± 0.06 | 1.22 ± 0.21 | 0.53 ± 0.09 | 0.48 ± 0.12 |
| Flavanones                      | 0.41 ± 0.06 | 1.22 ± 0.21 | 0.53 ± 0.09 | 0.48 ± 0.12 |
| 3,4-Dihydroxybenzoic acid       | 2.05 ± 0.50 | 3.78 ± 0.10 | 3.83 ± 0.47 | 2.45 ± 0.15 |
| 4-hydroxybenzoic acid           | 216 ± 41    | 115 ± 3     | ND ± ND     | ND ± ND     |
| Gallic acid                     | ND ± ND     | 336 ± 39    | 163 ± 5     | 150 ± 21    |
| Vanillic acid 4-β-D-glucoside   | 10.6 ± 1.9  | 4.79 ± 0.67 | 13.5 ± 1.1  | 9.93 ± 1.21 |
| Vanillin                        | 7.62 ± 1.11 | ND ± ND     | ND ± ND     | ND ± ND     |
| Hydroxybenzoic acids            | 236 ± 44    | 460 ± 42    | 180 ± 7     | 162 ± 23    |
| Ferulic acid (trans)            | ND ± ND     | 15.7 ± 3.5  | ND ± ND     | 41.0 ± 7.5  |
| Hydroxycinnamic acids           | ND ± ND     | 15.7 ± 3.5  | ND ± ND     | 41.0 ± 7.5  |
| Hydroxycoumarins                | ND ± ND     | ND ± ND     | ND ± ND     | ND ± ND     |
| Prunetin                        | 2.30 ± 0.10 | 0.49 ± 0.13 | ND ± ND     | ND ± ND     |
| Isoflavones                     | 2.30 ± 0.10 | 0.49 ± 0.13 | ND ± ND     | ND ± ND     |
| Procyanidins                    | ND ± ND     | ND ± ND     | ND ± ND     | ND ± ND     |
| Stilbenes                       | ND ± ND     | ND ± ND     | ND ± ND     | ND ± ND     |

**Table S8.** Concentrations of polyphenols in faba bean seed coat extracts ( $\mu\text{mol/g}$  dry weight)

| Compound                                           | F1              | F2              | F3              | F4              |
|----------------------------------------------------|-----------------|-----------------|-----------------|-----------------|
|                                                    | Mean $\pm$ SD   | Mean $\pm$ SD   | Mean $\pm$ SD   | Mean $\pm$ SD   |
| Anthocyanins                                       | ND $\pm$ ND     | ND $\pm$ ND     | ND $\pm$ ND     | ND $\pm$ ND     |
| Chalcones                                          | ND $\pm$ ND     | ND $\pm$ ND     | ND $\pm$ ND     | ND $\pm$ ND     |
| Dihydromyricetin                                   | 1.66 $\pm$ 0.67 | 4.68 $\pm$ 1.11 | 9.96 $\pm$ 1.67 | 10.1 $\pm$ 1.1  |
| Taxifolin (dihydroquercetin)                       | 1.55 $\pm$ 0.46 | 1.64 $\pm$ 0.28 | 2.21 $\pm$ 0.12 | 2.59 $\pm$ 0.39 |
| Dihydroflavonols                                   | 3.21 $\pm$ 1.13 | 6.32 $\pm$ 1.39 | 12.2 $\pm$ 1.8  | 12.7 $\pm$ 1.5  |
| Vitexin                                            | ND $\pm$ ND     | 6.99 $\pm$ 1.38 | 0.62 $\pm$ 0.09 | 1.39 $\pm$ 0.09 |
| Luteolin                                           | 0.90 $\pm$ 0.38 | 0.77 $\pm$ 0.14 | 0.41 $\pm$ 0.07 | 1.15 $\pm$ 0.15 |
| Luteolin 4'-O-glucoside                            | ND $\pm$ ND     | 0.30 $\pm$ 0.04 | 0.43 $\pm$ 0.07 | 0.35 $\pm$ 0.07 |
| Luteolin 8'-C-glucoside                            | ND $\pm$ ND     | 0.77 $\pm$ 0.20 | 0.24 $\pm$ 0.01 | 0.30 $\pm$ 0.07 |
| Flavones                                           | 0.90 $\pm$ 0.38 | 8.83 $\pm$ 1.76 | 1.70 $\pm$ 0.24 | 3.19 $\pm$ 0.38 |
| Isorhamnetin                                       | 2.85 $\pm$ 0.38 | 2.19 $\pm$ 0.38 | 0.37 $\pm$ 0.34 | 1.01 $\pm$ 0.11 |
| Kaempferol 3-O-robinoside-7-O-rhamnoside (robinin) | 3.33 $\pm$ 0.48 | 0.36 $\pm$ 0.02 | 3.25 $\pm$ 0.63 | 3.05 $\pm$ 0.28 |
| Kaempferol 3-O-D-galactoside                       | 0.51 $\pm$ 0.43 | ND $\pm$ ND     | ND $\pm$ ND     | ND $\pm$ ND     |
| Kaempferol 3-O-glucoside                           | 2.55 $\pm$ 0.39 | 3.93 $\pm$ 0.32 | ND $\pm$ ND     | ND $\pm$ ND     |
| Kaempferol 3-O-rutinoside                          | 0.22 $\pm$ 0.02 | 6.36 $\pm$ 0.05 | ND $\pm$ ND     | 0.58 $\pm$ 0.03 |
| Myricetin                                          | 1.20 $\pm$ 0.46 | 13.6 $\pm$ 2.0  | 5.72 $\pm$ 0.93 | 9.23 $\pm$ 2.16 |
| Myricetin 3-O-rhamnoside                           | ND $\pm$ ND     | 5.71 $\pm$ 1.32 | 8.36 $\pm$ 1.93 | 25.9 $\pm$ 4.9  |
| Quercetin                                          | 5.59 $\pm$ 1.14 | 6.01 $\pm$ 1.86 | 1.25 $\pm$ 0.25 | 5.01 $\pm$ 0.73 |
| Quercetin 3-O-galactoside                          | 0.35 $\pm$ 0.15 | 1.05 $\pm$ 0.08 | 0.46 $\pm$ 0.08 | 0.66 $\pm$ 0.13 |
| Quercetin 3-O-glucoside (Isoquercetrin)            | 1.89 $\pm$ 0.34 | 1.12 $\pm$ 0.01 | 0.37 $\pm$ 0.06 | 0.87 $\pm$ 0.05 |
| Quercetin 3-O-rhamnoside (Quercitrin)              | ND $\pm$ ND     | 1.46 $\pm$ 0.20 | 1.29 $\pm$ 0.09 | 3.90 $\pm$ 0.34 |
| Quercetin 3-O-rutinoside(Rutin)                    | 1.37 $\pm$ 0.13 | 0.18 $\pm$ 0.02 | 3.42 $\pm$ 0.50 | 2.28 $\pm$ 0.40 |
| Flavonols                                          | 19.9 $\pm$ 3.9  | 42.0 $\pm$ 6.3  | 24.5 $\pm$ 4.8  | 52.5 $\pm$ 9.1  |

|                                              |             |             |                  |                |
|----------------------------------------------|-------------|-------------|------------------|----------------|
| (+)-Catechin                                 | ND ± ND     | 48.1 ± 5.9  | 61.2 ± 3.2       | 142 ± 30       |
| catechin-glucoside                           | ND ± ND     | 1.38 ± 0.31 | 1.45 ± 0.16      | 7.37 ± 0.40    |
| (-)-Epicatechin                              | ND ± ND     | 76.4 ± 6.1  | 1587 ± 158       | 137 ± 10       |
| (-)-Epigallocatechin                         | ND ± ND     | 82.2 ± 6.1  | 1078 ± 185       | 75.3 ± 8.9     |
| (-)-Gallocatechin                            | ND ± ND     | 33.5 ± 1.6  | 30.3 ± 2.8       | 71.9 ± 6.4     |
| Flavan-3-ols                                 | ND ± ND     | 242 ± 20    | 2758 ± 349       | 434 ± 56       |
| Naringenin                                   | ND ± ND     | 0.55 ± 0.11 | 0.47 ± 0.03      | 0.68 ± 0.08    |
| Flavanones                                   | ND ± ND     | 0.55 ± 0.11 | 0.47 ± 0.03      | 0.68 ± 0.08    |
| 3,4-Dihydroxybenzoic acid                    | 5.98 ± 0.22 | 13.7 ± 0.8  | 14.2 ± 1.9       | 28.8 ± 2.5     |
| Gallic acid                                  | 0.95 ± 0.03 | 42.4 ± 5.3  | 30.7 ± 3.7       | 53.5 ± 4.1     |
| Vanillic acid 4-β-D-glucoside                | 4.88 ± 0.62 | 14.9 ± 2.2  | 24.2 ± 1.0       | 20.2 ± 2.4     |
| Hydroxybenzoic acids                         | 11.8 ± 0.9  | 71.0 ± 8.3  | 69.1 ± 6.6       | 103 ± 9        |
| Caffeic acid                                 | 14.9 ± 2.1  | 0.50 ± 0.07 | 1.15 ± 0.11      | 3.38 ± 0.43    |
| Chlorogenic acid                             | ND ± ND     | 9.10 ± 1.00 | 170 ± 29         | 74.5 ± 10.6    |
| Hydroxycinnamic acids                        | 14.9 ± 2.1  | 9.60 ± 1.07 | 171 ± 29         | 77.9 ± 11.0    |
| Hydroxycoumarins                             | ND ± ND     | ND ± ND     | ND ± ND          | ND ± ND        |
| Isoflavones                                  | ND ± ND     | ND ± ND     | ND ± ND          | ND ± ND        |
| Procyanidin B1                               | ND ± ND     | 38.1 ± 4.1  | 389 ± 35         | 228 ± 21       |
| Procyanidin B3                               | ND ± ND     | 36.4 ± 4.4  | 488 ± 72         | 298 ± 16       |
| Procyanidin C1                               | ND ± ND     | 11.0 ± 2.5  | 142 ± 4          | 89.0 ± 6.4     |
| Procyanidins                                 | ND ± ND     | 85.5 ± 11.0 | 1019.00 ± 110.00 | 615.00 ± 43.40 |
| Resveratrol 3-β-mono-D-glucoside (Polydatin) | ND ± ND     | 14.2 ± 1.7  | 8.13 ± 1.40      | 13.3 ± 0.3     |
| Stilbenes                                    | ND ± ND     | 14.2 ± 1.7  | 8.13 ± 1.40      | 13.3 ± 0.3     |



**Table S9.** Estimated amounts ( $\mu\text{mol/g}$ ) of major polyphenols detected in common bean seed coats by the untargeted method and not quantified in Table 4. Vanillic acid 4- $\beta$ -D-glucoside was used to estimate the amounts of phenolic acids, whereas kaempferol 3-O-rutinoside, quercetin 3-O-rhamnoside, myricetin 3-O-rhamnoside, luteolin 4'-O-glucoside and delphinidin 3- $\beta$ -D-glucoside were used to estimate the amounts of kaempferol, quercetin and myricetin compounds, flavones and anthocyanins, respectively. Flavan-3-ols were estimated as catechin equivalents, while procyanidins, prodelphinidins and propelargonidins were estimated as procyanidin B1 equivalent.

| Name                            | Formula        | Molecular Weight | RT [min] | B1  | B2  | B3  | B4  |
|---------------------------------|----------------|------------------|----------|-----|-----|-----|-----|
| Dihydroxybenzoic acid           | C7 H6 O4       | 154.02667        | 10.99    | ND  | ND  | ND  | ND  |
| Phenolic acid derivative        | C11 H12 O5     | 224.06867        | 10.99    | 1   | ND  | ND  | 3   |
| Phenolic acid derivative        | C11 H12 O6     | 240.06358        | 8.54     | 72  | 215 | 558 | 221 |
| Phenolic acid derivative        | C12 H16 O5     | 240.10005        | 9.19     | 7   | 5   | 3   | 5   |
| Phenolic acid derivative        | C13 H20 O4     | 240.13636        | 12.97    | 25  | 32  | 6   | 21  |
| Phenolic acid derivative        | C12 H18 O5     | 242.1157         | 5.86     | 1   | 2   | 5   | 3   |
| Phenolic acid derivative        | C12 H18 O6     | 258.11044        | 5.42     | ND  | ND  | ND  | ND  |
| Phenolic acid derivative        | C12 H18 O6     | 258.11047        | 6.24     | ND  | ND  | ND  | ND  |
| Phenolic acid derivative        | C12 H14 O7     | 270.07392        | 9.62     | ND  | ND  | ND  | ND  |
| Phenolic acid derivative        | C14 H24 O5     | 272.16243        | 10.59    | 257 | 25  | 191 | ND  |
| Phenolic acid derivative        | C14 H24 O5     | 272.1625         | 9.89     | 365 | 61  | 195 | ND  |
| Hydroxybenzoic acid hexoside    | C13 H16 O8     | 300.08462        | 6.40     | ND  | 2   | 11  | 2   |
| Hydroxybenzoic acid hexoside    | C13 H16 O8     | 300.08472        | 3.94     | 2   | 72  | 71  | 76  |
| Dihydroxybenzoic acid hexoside  | C13 H16 O9     | 316.07957        | 8.48     | ND  | 1   | 15  | 2   |
| Dihydroxybenzoic acid hexoside  | C13 H16 O9     | 316.07964        | 8.97     | ND  | 16  | 5   | 8   |
| Trihydroxybenzoic acid hexoside | C13 H16 O10    | 332.07459        | 13.38    | ND  | 3   | 37  | 4   |
| Phenolic acid deoxyhexoside     | C15 H16 O10    | 356.07484        | 9.66     | ND  | 17  | 222 | 1   |
| Phenolic acid derivative        | C15 H18 N O9 P | 387.07262        | 12.08    | ND  | ND  | ND  | ND  |
| Hydroxybenzoic acid derivative  | C16 H20 O11    | 388.10104        | 9.22     | 2   | 2   | ND  | 1   |

|                                                      |             |           |       |            |             |             |            |
|------------------------------------------------------|-------------|-----------|-------|------------|-------------|-------------|------------|
| Phenolic acid derivative                             | C18 H28 O9  | 388.17373 | 7.18  | 26         | 42          | 19          | 92         |
| Phenolic acid derivative                             | C18 H28 O10 | 404.16868 | 8.59  | ND         | ND          | ND          | ND         |
| Phenolic acid derivative                             | C18 H28 O10 | 404.1687  | 11.13 | ND         | ND          | ND          | ND         |
| 5-O-[B-apiosyl-(1-2)-O-B-xylopyranosyl]gentisic acid | C17 H22 O12 | 418.11142 | 10.98 | ND         | ND          | 18          | 15         |
| Caffeic acid malonyl glucoside                       | C16 H28 O13 | 428.15318 | 2.24  | ND         | ND          | ND          | ND         |
| Hydroxybenzoic acid hexoside pentoside               | C18 H24 O12 | 432.12679 | 5.74  | 25         | 61          | 2           | 96         |
| Dihydroxybenzoic acid pentoside hexoside             | C18 H24 O13 | 448.12215 | 9.43  | ND         | 12          | 5           | 10         |
| Phenolic acid derivative                             | C20 H28 O14 | 492.14852 | 7.91  | ND         | 25          | 5           | 1          |
| Phenolic acid derivative                             | C21 H32 O13 | 492.18471 | 12.43 | 4          | 9           | ND          | 8          |
| Phenolic acid dihexoside derivative                  | C28 H34 O18 | 658.17597 | 6.47  | ND         | 210         | ND          | ND         |
| Phenolic acid dihexoside derivative                  | C29 H36 O18 | 672.19118 | 7.75  | ND         | 232         | ND          | ND         |
| <b>Phenolic acids</b>                                |             |           |       | <b>787</b> | <b>1044</b> | <b>1368</b> | <b>569</b> |
| Kaempferol acetyl hexoside                           | C23 H22 O12 | 490.11134 | 16.39 | 2          | 832         | 4761        | 1975       |
| Kaempferol dihexoside                                | C27 H30 O16 | 610.15424 | 12.47 | ND         | 1           | 1884        | 45         |
| Kaempferol malonyl hexoside                          | C24 H22 O14 | 534.10118 | 16.40 | 5          | 2403        | 19865       | 7070       |
| Kaempferol 3-O-sambioside (leucoside)                | C26 H28 O15 | 580.1433  | 13.41 | 10         | 127         | 9239        | 1510       |
| Kaempferol pentoside-hexoside-deoxyhexoside          | C32 H38 O19 | 726.20143 | 12.95 | ND         | ND          | ND          | ND         |
| Myricetin derivative                                 | C34 H42 O22 | 802.21764 | 11.20 | ND         | ND          | ND          | ND         |
| Myricetin 3-O-glucoside                              | C21 H20 O13 | 480.09095 | 12.36 | ND         | 5539        | 154         | 2          |
| Myricetin hexoside deoxyhexoside                     | C27 H30 O17 | 626.14864 | 12.19 | ND         | ND          | 4           | ND         |
| Myricetin hexoside deoxyhexoside                     | C27 H30 O17 | 626.14869 | 12.11 | ND         | 17          | ND          | ND         |
| Myricetin hexoside dideoxyhexoside                   | C33 H40 O21 | 772.20664 | 12.29 | ND         | ND          | ND          | ND         |
| Myricetin pentoside-hexoside-deoxyhexoside           | C32 H38 O21 | 758.19094 | 11.32 | ND         | 1           | 1           | ND         |
| Myricetin pentoside-hexoside-deoxyhexoside           | C32 H38 O21 | 758.19098 | 11.55 | ND         | 8           | ND          | ND         |
| Quercetin deoxyhexoside                              | C21 H20 O11 | 448.10092 | 16.75 | ND         | ND          | 2           | ND         |

|                                                                                    |             |            |       |    |      |       |       |
|------------------------------------------------------------------------------------|-------------|------------|-------|----|------|-------|-------|
| Quercetin hexoside derivative                                                      | C24 H26 O13 | 522.13792  | 10.21 | ND | 78   | ND    | ND    |
| Quercetin hexoside derivative                                                      | C24 H26 O13 | 522.13791  | 9.48  | ND | 100  | ND    | ND    |
| Quercetin pentoside                                                                | C17 H22 O13 | 434.10639  | 14.31 | ND | ND   | ND    | ND    |
| Quercetin pentoside-hexoside-deoxyhexoside                                         | C32 H38 O20 | 742.19611  | 12.15 | ND | ND   | ND    | ND    |
| Quercetin pentoside-hexoside-deoxyhexoside                                         | C32 H38 O20 | 742.19625  | 12.24 | ND | ND   | ND    | ND    |
| 3,5-Dihydroxy-2-(4-hydroxyphenyl)-4-oxo-3,4-dihydro-2H-chromen-7-yl hexopyranoside | C21 H22 O11 | 450.11658  | 9.89  | ND | 32   | 877   | 133   |
| Flavonols                                                                          |             |            |       | 17 | 9138 | 36787 | 10735 |
| Tricetin hexoside                                                                  | C21 H20 O12 | 464.09605  | 16.75 | ND | 5    | ND    | ND    |
| Tricetin hexoside                                                                  | C21 H20 O12 | 464.09606  | 15.16 | ND | ND   | ND    | ND    |
| Flavones                                                                           |             |            |       | 0  | 5    | 0     | 0     |
| Afzelechin                                                                         | C15 H14 O5  | 274.0845   | 10.29 | ND | ND   | 167   | 11    |
| Epi-afzelechin                                                                     | C15 H14 O5  | 274.08451  | 11.15 | ND | 1    | 174   | 55    |
| (Epi)afzelechin hexoside                                                           | C21 H24 O10 | 436.13738  | 7.70  | ND | 3    | 262   | 308   |
| (Epi)catechin hexoside                                                             | C21 H24 O11 | 452.13217  | 6.59  | ND | 484  | 386   | 1714  |
| (Epi)catechin hexoside                                                             | C21 H24 O11 | 452.13245  | 9.34  | ND | 1    | 5     | 2     |
| (Epi)gallocatechin hexoside                                                        | C21 H24 O12 | 468.12707  | 4.85  | ND | 261  | ND    | ND    |
| (Epi)gallocatechin hexoside                                                        | C21 H24 O12 | 468.12722  | 7.88  | ND | ND   | ND    | ND    |
| Flavan-3-ols                                                                       |             |            |       | 0  | 750  | 994   | 2090  |
| AA                                                                                 | C30 H26 O10 | 546.15358  | 11.42 | ND | ND   | 302   | 80    |
| AA                                                                                 | C30 H26 O10 | 546.1536   | 10.35 | ND | ND   | 239   | 39    |
| AC                                                                                 | C30 H26 O11 | 562.148    | 9.14  | ND | 98   | 792   | 1447  |
| AAC                                                                                | C45 H38 O16 | 834.2176   | 10.94 | ND | 1    | 180   | 130   |
| ACC                                                                                | C45 H38 O17 | 850.21255  | 10.25 | ND | 7    | 117   | 394   |
| ACC                                                                                | C45 H38 O17 | 850.21255  | 9.91  | ND | 9    | 61    | 222   |
| ACCC                                                                               | C60 H50 O23 | 1138.27613 | 10.61 | ND | 3    | 71    | 360   |
| ACCCC                                                                              | C75 H62 O29 | 1426.3409  | 11.45 | ND | 4    | 75    | 446   |
| Propelargonidins                                                                   |             |            |       | 0  | 122  | 1837  | 3118  |

|              |              |            |       |    |     |     |      |
|--------------|--------------|------------|-------|----|-----|-----|------|
| CC           | C30 H26 O12  | 578.14271  | 9.83  | ND | 3   | 4   | 2    |
| CC           | C30 H26 O12  | 578.14298  | 10.40 | ND | 4   | 3   | 40   |
| CC           | C30 H26 O12  | 578.14315  | 11.61 | ND | 71  | 76  | 520  |
| CCC          | C45 H38 O18  | 866.20698  | 10.87 | ND | 8   | 25  | 84   |
| CCC          | C45 H38 O18  | 866.207    | 6.03  | ND | 56  | 20  | 464  |
| CCC          | C45 H38 O18  | 866.20703  | 9.25  | ND | 94  | 142 | 1147 |
| CCC          | C45 H38 O18  | 866.20715  | 9.73  | ND | 25  | 38  | 495  |
| CCCC         | C60 H50 O24  | 1154.27068 | 9.84  | ND | 7   | 8   | 360  |
| CCCC         | C60 H50 O24  | 1154.2707  | 9.97  | ND | 12  | 32  | 276  |
| CCCC         | C60 H50 O24  | 1154.27127 | 11.69 | ND | 11  | 83  | 250  |
| CCCCC        | C75 H62 O30  | 1442.33558 | 10.99 | ND | 9   | 40  | 573  |
| CCCCC        | C75 H62 O30  | 1442.33568 | 10.45 | ND | 13  | 12  | 271  |
| CCCCCC       | C90 H74 O36  | 1730.39828 | 11.68 | ND | 4   | 18  | 209  |
| CCCCCCC      | C105 H86 O42 | 2018.46508 | 12.00 | ND | ND  | 4   | 194  |
| Procyanidins |              |            |       | 0  | 317 | 505 | 4885 |
| GGCCC        | C75 H62 O32  | 1474.32534 | 9.09  | ND | 74  | ND  | ND   |
| GGGGC        | C75 H62 O34  | 1506.31495 | 7.97  | ND | 288 | ND  | ND   |
| GC           | C30 H26 O13  | 594.13772  | 8.67  | ND | 12  | ND  | ND   |
| GC           | C30 H26 O13  | 594.13794  | 7.53  | ND | 153 | ND  | ND   |
| GC           | C30 H26 O13  | 594.13794  | 6.68  | ND | 259 | ND  | ND   |
| GC           | C30 H26 O13  | 594.13794  | 7.22  | ND | 24  | ND  | ND   |
| GC           | C30 H26 O13  | 594.13798  | 6.32  | ND | 613 | ND  | ND   |
| GC           | C30 H26 O13  | 594.13803  | 9.01  | ND | 9   | ND  | 2    |
| GCC          | C45 H38 O19  | 882.20148  | 9.54  | ND | 9   | ND  | ND   |
| GCC          | C45 H38 O19  | 882.20187  | 8.24  | ND | 381 | ND  | 2    |
| GCC          | C45 H38 O19  | 882.2021   | 8.36  | ND | 53  | ND  | ND   |
| GCC          | C45 H38 O19  | 882.20213  | 5.17  | ND | 75  | ND  | ND   |
| GGC          | C45 H38 O20  | 898.19605  | 4.78  | ND | 88  | ND  | ND   |
| GGC          | C45 H38 O20  | 898.19622  | 7.43  | ND | 402 | ND  | ND   |
| GGC          | C45 H38 O20  | 898.19641  | 7.34  | ND | 66  | ND  | ND   |

|                       |              |            |       |    |      |    |    |
|-----------------------|--------------|------------|-------|----|------|----|----|
| GGC                   | C45 H38 O20  | 898.19674  | 9.98  | ND | 26   | ND | ND |
| GCCC                  | C60 H50 O25  | 1170.26587 | 9.38  | ND | 34   | ND | ND |
| GGCC                  | C60 H50 O26  | 1186.26057 | 9.66  | ND | 17   | ND | ND |
| GGCC                  | C60 H50 O26  | 1186.26075 | 8.56  | ND | 6    | ND | ND |
| GGGC                  | C60 H50 O27  | 1202.25548 | 7.85  | ND | 21   | ND | ND |
| GCCCC                 | C75 H62 O31  | 1458.33039 | 10.23 | ND | 6    | ND | 2  |
| GGCCC                 | C75 H62 O32  | 1474.32422 | 10.53 | ND | 13   | ND | ND |
| GGCCC                 | C75 H62 O32  | 1474.32441 | 9.35  | ND | 58   | ND | ND |
| GGGCC                 | C75 H62 O33  | 1490.31944 | 8.78  | ND | 23   | ND | ND |
| GGGCC                 | C75 H62 O33  | 1490.31961 | 9.02  | ND | 192  | ND | ND |
| GGGGC                 | C75 H62 O34  | 1506.31474 | 8.12  | ND | 3    | ND | ND |
| GGGGC                 | C75 H62 O34  | 1506.31576 | 8.30  | ND | 66   | ND | ND |
| GGGCCC                | C90 H74 O39  | 1778.38314 | 9.71  | ND | 40   | ND | 2  |
| GGGGCC                | C90 H74 O40  | 1794.37975 | 9.19  | ND | 128  | ND | ND |
| GGGGGC                | C90 H74 O41  | 1810.37349 | 8.47  | ND | 93   | ND | ND |
| GGGCCCC               | C105 H86 O45 | 2066.4502  | 10.55 | ND | 29   | ND | ND |
| GGGGCCC               | C105 H86 O46 | 2082.44459 | 9.92  | ND | 9    | ND | ND |
| "G-C"-prodelphinidins |              |            |       | 0  | 3270 | 0  | 8  |
| GG                    | C30 H26 O14  | 610.13302  | 6.17  | ND | 13   | ND | ND |
| GG                    | C30 H26 O14  | 610.13303  | 8.24  | ND | 7    | ND | 1  |
| GG                    | C30 H26 O14  | 610.13304  | 4.82  | ND | 614  | ND | ND |
| GG                    | C30 H26 O14  | 610.13321  | 6.48  | ND | 92   | ND | ND |
| GG-deoxyhexoside      | C33 H40 O20  | 756.21216  | 13.14 | ND | ND   | ND | ND |
| GGG                   | C45 H38 O21  | 914.1916   | 7.72  | ND | 27   | ND | ND |
| GGG                   | C45 H38 O21  | 914.19169  | 6.63  | ND | 177  | ND | ND |
| GGG                   | C45 H38 O21  | 914.19184  | 4.37  | ND | 60   | ND | ND |
| GGG                   | C45 H38 O21  | 914.19192  | 7.82  | ND | 32   | ND | ND |
| GGGG                  | C60 H50 O28  | 1218.2508  | 7.33  | ND | 5    | ND | ND |
| GGGG                  | C60 H50 O28  | 1218.25088 | 9.58  | ND | 1    | ND | ND |
| GGGGG                 | C75 H62 O35  | 1522.3086  | 10.05 | ND | 5    | ND | ND |

|                                                                |              |            |      |    |      |    |    |
|----------------------------------------------------------------|--------------|------------|------|----|------|----|----|
| GGGGG                                                          | C75 H62 O35  | 1522.30948 | 7.66 | ND | 3    | ND | ND |
| GGGGGG                                                         | C90 H74 O42  | 1826.36757 | 8.90 | ND | 1    | ND | ND |
| GGGGGGG                                                        | C105 H86 O49 | 2130.43022 | 9.17 | ND | 7    | ND | ND |
| "G"-prodelphinidins                                            |              |            |      | 0  | 1044 | 0  | 1  |
| Delphinidin 3-O-(2-O-β-d-Glucopyranosyl-α-l-arabinopyranoside) | C26 H28 O16  | 596.13879  | 6.68 | ND | ND   | ND | ND |
| Anthocyanins                                                   |              |            |      | 0  | 0    | 0  | 0  |

**Table S10.** Estimated amounts ( $\mu\text{mol/g}$ ) of major polyphenols detected in lentil seed coats by the untargeted method and not quantified in Table 5. Vanillic acid 4- $\beta$ -D-glucoside was used to estimate the amounts of phenolic acids, whereas kaempferol 3-O-rutinoside, quercetin 3-O-rhamnoside, myricetin 3-O-rhamnoside, luteolin 4'-O-glucoside and delphinidin 3- $\beta$ -D-glucoside were used to estimate the amounts of kaempferol, quercetin and myricetin compounds, flavones and anthocyanins, respectively. Flavan-3-ols were estimated as catechin equivalents, while procyanidins, prodelphinidins and propelargonidins were estimated as procyanidin B1 equivalent.

| Name                            | Formula        | Molecular Weight | RT [min] | L1  | L2  | L3  | L4  |
|---------------------------------|----------------|------------------|----------|-----|-----|-----|-----|
| Dihydroxybenzoic acid           | C7 H6 O4       | 154.02667        | 10.99    | ND  | ND  | ND  | ND  |
| Phenolic acid derivative        | C11 H12 O5     | 224.06867        | 10.99    | ND  | ND  | ND  | ND  |
| Phenolic acid derivative        | C11 H12 O6     | 240.06358        | 8.54     | ND  | ND  | ND  | ND  |
| Phenolic acid derivative        | C12 H16 O5     | 240.10005        | 9.19     | 7   | 4   | 2   | 3   |
| Phenolic acid derivative        | C13 H20 O4     | 240.13636        | 12.97    | 904 | 274 | 183 | 587 |
| Phenolic acid derivative        | C12 H18 O5     | 242.1157         | 5.86     | 6   | 3   | 3   | 4   |
| Phenolic acid derivative        | C12 H18 O6     | 258.11044        | 5.42     | ND  | ND  | ND  | ND  |
| Phenolic acid derivative        | C12 H18 O6     | 258.11047        | 6.24     | ND  | ND  | ND  | ND  |
| Phenolic acid derivative        | C12 H14 O7     | 270.07392        | 9.62     | ND  | ND  | ND  | ND  |
| Phenolic acid derivative        | C14 H24 O5     | 272.16243        | 10.59    | 3   | ND  | ND  | ND  |
| Phenolic acid derivative        | C14 H24 O5     | 272.1625         | 9.89     | 6   | ND  | 2   | ND  |
| Hydroxybenzoic acid hexoside    | C13 H16 O8     | 300.08462        | 6.40     | 786 | 254 | 110 | 201 |
| Hydroxybenzoic acid hexoside    | C13 H16 O8     | 300.08472        | 3.94     | 868 | 99  | 266 | 238 |
| Dihydroxybenzoic acid hexoside  | C13 H16 O9     | 316.07957        | 8.48     | 3   | 2   | 2   | 2   |
| Dihydroxybenzoic acid hexoside  | C13 H16 O9     | 316.07964        | 8.97     | 53  | 63  | 65  | 95  |
| Trihydroxybenzoic acid hexoside | C13 H16 O10    | 332.07459        | 13.38    | 2   | 5   | 12  | 6   |
| Phenolic acid deoxyhexoside     | C15 H16 O10    | 356.07484        | 9.66     | ND  | ND  | ND  | ND  |
| Phenolic acid derivative        | C15 H18 N O9 P | 387.07262        | 12.08    | 2   | ND  | ND  | ND  |
| Hydroxybenzoic acid derivative  | C16 H20 O11    | 388.10104        | 9.22     | 209 | 20  | 43  | 20  |

|                                                      |             |           |       |             |             |             |             |
|------------------------------------------------------|-------------|-----------|-------|-------------|-------------|-------------|-------------|
| Phenolic acid derivative                             | C18 H28 O9  | 388.17373 | 7.18  | 49          | 20          | 24          | 30          |
| Phenolic acid derivative                             | C18 H28 O10 | 404.16868 | 8.59  | 6           | ND          | ND          | ND          |
| Phenolic acid derivative                             | C18 H28 O10 | 404.1687  | 11.13 | 6           | 1           | 2           | 1           |
| 5-O-[B-apiosyl-(1-2)-O-B-xylopyranosyl]gentisic acid | C17 H22 O12 | 418.11142 | 10.98 | 2191        | 587         | 994         | 1027        |
| Caffeic acid malonyl glucoside                       | C16 H28 O13 | 428.15318 | 2.24  | 2           | ND          | ND          | ND          |
| Hydroxybenzoic acid hexoside pentoside               | C18 H24 O12 | 432.12679 | 5.74  | 7           | 3           | 9           | 2           |
| Dihydroxybenzoic acid pentoside hexoside             | C18 H24 O13 | 448.12215 | 9.43  | 454         | 187         | 256         | 276         |
| Phenolic acid derivative                             | C20 H28 O14 | 492.14852 | 7.91  | 3           | 297         | 140         | 105         |
| Phenolic acid derivative                             | C21 H32 O13 | 492.18471 | 12.43 | 1144        | 687         | 864         | 806         |
| Phenolic acid dihexoside derivative                  | C28 H34 O18 | 658.17597 | 6.47  | ND          | ND          | ND          | ND          |
| Phenolic acid dihexoside derivative                  | C29 H36 O18 | 672.19118 | 7.75  | ND          | ND          | ND          | ND          |
| <b>Phenolic acids</b>                                |             |           |       | <b>6711</b> | <b>2506</b> | <b>2977</b> | <b>3403</b> |
| Kaempferol acetyl hexoside                           | C23 H22 O12 | 490.11134 | 16.39 | ND          | ND          | ND          | ND          |
| Kaempferol dihexoside                                | C27 H30 O16 | 610.15424 | 12.47 | 3           | 12          | 12          | 11          |
| Kaempferol malonyl hexoside                          | C24 H22 O14 | 534.10118 | 16.40 | ND          | ND          | ND          | ND          |
| Kaempferol 3-O-sambioside (leucoside)                | C26 H28 O15 | 580.1433  | 13.41 | ND          | 1           | ND          | ND          |
| Kaempferol pentoside-hexoside-deoxyhexoside          | C32 H38 O19 | 726.20143 | 12.95 | ND          | ND          | ND          | ND          |
| Myricetin derivative                                 | C34 H42 O22 | 802.21764 | 11.20 | ND          | ND          | ND          | ND          |
| Myricetin 3-O-glucoside                              | C21 H20 O13 | 480.09095 | 12.36 | ND          | 9           | 7           | 6           |
| Myricetin hexoside deoxyhexoside                     | C27 H30 O17 | 626.14864 | 12.19 | ND          | 2           | 12          | 3           |
| Myricetin hexoside deoxyhexoside                     | C27 H30 O17 | 626.14869 | 12.11 | ND          | 5           | 19          | 4           |
| Myricetin hexoside dideoxyhexoside                   | C33 H40 O21 | 772.20664 | 12.29 | ND          | ND          | ND          | ND          |
| Myricetin pentoside-hexoside-deoxyhexoside           | C32 H38 O21 | 758.19094 | 11.32 | ND          | ND          | ND          | ND          |
| Myricetin pentoside-hexoside-deoxyhexoside           | C32 H38 O21 | 758.19098 | 11.55 | ND          | ND          | ND          | ND          |
| Quercetin deoxyhexoside                              | C21 H20 O11 | 448.10092 | 16.75 | ND          | 28          | ND          | 2           |



|                                                                                    |             |            |       |    |     |     |     |
|------------------------------------------------------------------------------------|-------------|------------|-------|----|-----|-----|-----|
| Quercetin hexoside derivative                                                      | C24 H26 O13 | 522.13792  | 10.21 | ND | ND  | ND  | ND  |
| Quercetin hexoside derivative                                                      | C24 H26 O13 | 522.13791  | 9.48  | ND | ND  | ND  | ND  |
| Quercetin pentoside                                                                | C17 H22 O13 | 434.10639  | 14.31 | 27 | 64  | 166 | 111 |
| Quercetin pentoside-hexoside-deoxyhexoside                                         | C32 H38 O20 | 742.19611  | 12.15 | ND | ND  | ND  | ND  |
| Quercetin pentoside-hexoside-deoxyhexoside                                         | C32 H38 O20 | 742.19625  | 12.24 | ND | ND  | ND  | ND  |
| 3,5-Dihydroxy-2-(4-hydroxyphenyl)-4-oxo-3,4-dihydro-2H-chromen-7-yl hexopyranoside | C21 H22 O11 | 450.11658  | 9.89  | 2  | 2   | 6   | 1   |
| Flavonols                                                                          |             |            |       | 32 | 123 | 222 | 138 |
| Tricetin hexoside                                                                  | C21 H20 O12 | 464.09605  | 16.75 | ND | 217 | 4   | 5   |
| Tricetin hexoside                                                                  | C21 H20 O12 | 464.09606  | 15.16 | ND | 440 | 22  | 17  |
| Flavones                                                                           |             |            |       | 0  | 657 | 26  | 22  |
| Afzelechin                                                                         | C15 H14 O5  | 274.0845   | 10.29 | ND | ND  | ND  | ND  |
| Epi-afzelechin                                                                     | C15 H14 O5  | 274.08451  | 11.15 | ND | ND  | ND  | ND  |
| (Epi)afzelechin hexoside                                                           | C21 H24 O10 | 436.13738  | 7.70  | ND | ND  | ND  | ND  |
| (Epi)catechin hexoside                                                             | C21 H24 O11 | 452.13217  | 6.59  | ND | 2   | 11  | 3   |
| (Epi)catechin hexoside                                                             | C21 H24 O11 | 452.13245  | 9.34  | ND | ND  | ND  | ND  |
| (Epi)gallocatechin hexoside                                                        | C21 H24 O12 | 468.12707  | 4.85  | ND | ND  | 2   | ND  |
| (Epi)gallocatechin hexoside                                                        | C21 H24 O12 | 468.12722  | 7.88  | ND | 8   | ND  | ND  |
| Flavan-3-ols                                                                       |             |            |       | 0  | 10  | 13  | 3   |
| AA                                                                                 | C30 H26 O10 | 546.15358  | 11.42 | ND | ND  | ND  | ND  |
| AA                                                                                 | C30 H26 O10 | 546.1536   | 10.35 | ND | ND  | ND  | ND  |
| AC                                                                                 | C30 H26 O11 | 562.148    | 9.14  | ND | 2   | 2   | 1   |
| AAC                                                                                | C45 H38 O16 | 834.2176   | 10.94 | ND | ND  | ND  | ND  |
| ACC                                                                                | C45 H38 O17 | 850.21255  | 10.25 | ND | ND  | ND  | ND  |
| ACC                                                                                | C45 H38 O17 | 850.21255  | 9.91  | ND | ND  | ND  | ND  |
| ACCC                                                                               | C60 H50 O23 | 1138.27613 | 10.61 | ND | ND  | ND  | ND  |
| ACCCC                                                                              | C75 H62 O29 | 1426.3409  | 11.45 | ND | ND  | ND  | ND  |
| Propelargonidins                                                                   |             |            |       | ND | 2   | 2   | 1   |

|              |              |            |       |    |      |      |      |
|--------------|--------------|------------|-------|----|------|------|------|
| CC           | C30 H26 O12  | 578.14271  | 9.83  | ND | 7    | 7    | 3    |
| CC           | C30 H26 O12  | 578.14298  | 10.40 | 9  | 242  | 325  | 274  |
| CC           | C30 H26 O12  | 578.14315  | 11.61 | ND | 24   | 16   | 8    |
| CCC          | C45 H38 O18  | 866.20698  | 10.87 | 3  | 166  | 206  | 178  |
| CCC          | C45 H38 O18  | 866.207    | 6.03  | 1  | 212  | 179  | 165  |
| CCC          | C45 H38 O18  | 866.20703  | 9.25  | 16 | 552  | 537  | 451  |
| CCC          | C45 H38 O18  | 866.20715  | 9.73  | ND | 10   | 7    | 5    |
| CCCC         | C60 H50 O24  | 1154.27068 | 9.84  | ND | 5    | 3    | 2    |
| CCCC         | C60 H50 O24  | 1154.2707  | 9.97  | ND | 6    | 1    | 1    |
| CCCC         | C60 H50 O24  | 1154.27127 | 11.69 | 7  | 92   | 118  | 86   |
| CCCCC        | C75 H62 O30  | 1442.33558 | 10.99 | ND | 124  | 179  | 145  |
| CCCCC        | C75 H62 O30  | 1442.33568 | 10.45 | ND | 2    | 1    | 1    |
| CCCCCC       | C90 H74 O36  | 1730.39828 | 11.68 | ND | 5    | 9    | 9    |
| CCCCCCC      | C105 H86 O42 | 2018.46508 | 12.00 | ND | ND   | ND   | ND   |
| Procyanidins |              |            |       | 36 | 1447 | 1588 | 1328 |
| GGCCC        | C75 H62 O32  | 1474.32534 | 9.09  | ND | 17   | 10   | 23   |
| GGGGC        | C75 H62 O34  | 1506.31495 | 7.97  | ND | 67   | 94   | 231  |
| GC           | C30 H26 O13  | 594.13772  | 8.67  | 8  | 300  | 386  | 334  |
| GC           | C30 H26 O13  | 594.13794  | 7.53  | 52 | 2234 | 2497 | 2240 |
| GC           | C30 H26 O13  | 594.13794  | 6.68  | ND | 7    | 29   | 20   |
| GC           | C30 H26 O13  | 594.13794  | 7.22  | ND | 3    | ND   | 3    |
| GC           | C30 H26 O13  | 594.13798  | 6.32  | ND | 100  | 197  | 152  |
| GC           | C30 H26 O13  | 594.13803  | 9.01  | ND | 19   | 17   | 26   |
| GCC          | C45 H38 O19  | 882.20148  | 9.54  | ND | 186  | 227  | 202  |
| GCC          | C45 H38 O19  | 882.20187  | 8.24  | 26 | 1316 | 1544 | 1345 |
| GCC          | C45 H38 O19  | 882.2021   | 8.36  | 26 | 1316 | 16   | 14   |
| GCC          | C45 H38 O19  | 882.20213  | 5.17  | ND | 48   | 62   | 61   |
| GGC          | C45 H38 O20  | 898.19605  | 4.78  | ND | 48   | 96   | 110  |
| GGC          | C45 H38 O20  | 898.19622  | 7.43  | 17 | 839  | 10   | 9    |
| GGC          | C45 H38 O20  | 898.19641  | 7.34  | ND | 834  | 889  | 898  |

|                       |              |            |       |     |       |       |       |
|-----------------------|--------------|------------|-------|-----|-------|-------|-------|
| GGC                   | C45 H38 O20  | 898.19674  | 9.98  | 2   | 135   | 155   | 155   |
| GCCC                  | C60 H50 O25  | 1170.26587 | 9.38  | 10  | 252   | 273   | 234   |
| GGCC                  | C60 H50 O26  | 1186.26057 | 9.66  | 5   | 186   | 222   | 217   |
| GGCC                  | C60 H50 O26  | 1186.26075 | 8.56  | 11  | 323   | 9     | 64    |
| GGGC                  | C60 H50 O27  | 1202.25548 | 7.85  | 11  | 590   | 715   | 813   |
| GCCCC                 | C75 H62 O31  | 1458.33039 | 10.23 | 9   | 261   | 329   | 286   |
| GGCCC                 | C75 H62 O32  | 1474.32422 | 10.53 | 2   | 142   | 152   | 193   |
| GGCCC                 | C75 H62 O32  | 1474.32441 | 9.35  | 10  | 344   | 395   | 386   |
| GGGCC                 | C75 H62 O33  | 1490.31944 | 8.78  | 8   | 320   | 381   | 426   |
| GGGCC                 | C75 H62 O33  | 1490.31961 | 9.02  | 2   | 148   | 235   | 216   |
| GGGGC                 | C75 H62 O34  | 1506.31474 | 8.12  | 5   | 220   | 111   | 199   |
| GGGGC                 | C75 H62 O34  | 1506.31576 | 8.30  | ND  | 193   | 6     | 17    |
| GGGCCC                | C90 H74 O39  | 1778.38314 | 9.71  | ND  | 281   | 406   | 427   |
| GGGGCC                | C90 H74 O40  | 1794.37975 | 9.19  | 4   | 332   | 573   | 652   |
| GGGGGC                | C90 H74 O41  | 1810.37349 | 8.47  | ND  | 119   | 202   | 267   |
| GGGCCCC               | C105 H86 O45 | 2066.4502  | 10.55 | ND  | 130   | 165   | 210   |
| GGGGCCC               | C105 H86 O46 | 2082.44459 | 9.92  | ND  | 171   | 265   | 292   |
| "G-C"-prodelphinidins |              |            |       | 208 | 11481 | 10668 | 10722 |
| GG                    | C30 H26 O14  | 610.13302  | 6.17  | ND  | ND    | ND    | ND    |
| GG                    | C30 H26 O14  | 610.13303  | 8.24  | ND  | 3     | 2     | 2     |
| GG                    | C30 H26 O14  | 610.13304  | 4.82  | ND  | 24    | 80    | 63    |
| GG                    | C30 H26 O14  | 610.13321  | 6.48  | 3   | 247   | 556   | 498   |
| GG-deoxyhexoside      | C33 H40 O20  | 756.21216  | 13.14 | ND  | ND    | ND    | ND    |
| GGG                   | C45 H38 O21  | 914.1916   | 7.72  | ND  | 2     | 4     | 3     |
| GGG                   | C45 H38 O21  | 914.19169  | 6.63  | 1   | 137   | 319   | 352   |
| GGG                   | C45 H38 O21  | 914.19184  | 4.37  | ND  | 7     | 21    | 28    |
| GGG                   | C45 H38 O21  | 914.19192  | 7.82  | ND  | 1     | 2     | 1     |
| GGGG                  | C60 H50 O28  | 1218.2508  | 7.33  | ND  | 44    | 58    | 80    |
| GGGG                  | C60 H50 O28  | 1218.25088 | 9.58  | ND  | 12    | 5     | 3     |
| GGGGG                 | C75 H62 O35  | 1522.3086  | 10.05 | ND  | 2     | 5     | 8     |

|                                                                                 |              |            |      |    |      |      |      |
|---------------------------------------------------------------------------------|--------------|------------|------|----|------|------|------|
| GGGGG                                                                           | C75 H62 O35  | 1522.30948 | 7.66 | ND | 33   | 52   | 67   |
| GGGGGG                                                                          | C90 H74 O42  | 1826.36757 | 8.90 | ND | 3    | 6    | 7    |
| GGGGGGG                                                                         | C105 H86 O49 | 2130.43022 | 9.17 | ND | 2    | 2    | 3    |
| "G"-prodelphinidins                                                             |              |            |      | 4  | 517  | 1112 | 1115 |
| Delphinidin 3-O-(2-O- $\beta$ -d-Glucopyranosyl- $\alpha$ -l-arabinopyranoside) | C26 H28 O16  | 596.13879  | 6.68 | ND | 2222 | ND   | ND   |
| Anthocyanins                                                                    |              |            |      | 0  | 2222 | 0    | 0    |

**Table S11.** Estimated amounts ( $\mu\text{mol/g}$ ) of major polyphenols detected in pea seed coats by the untargeted method and not quantified in Table 6. Vanillic acid 4- $\beta$ -D-glucoside was used to estimate the amounts of phenolic acids, whereas kaempferol 3-O-rutinoside, quercetin 3-O-rhamnoside, myricetin 3-O-rhamnoside, luteolin 4'-O-glucoside and delphinidin 3- $\beta$ -D-glucoside were used to estimate the amounts of kaempferol, quercetin and myricetin compounds, flavones and anthocyanins, respectively. Flavan-3-ols were estimated as catechin equivalents, while procyanidins, prodelphinidins and propelargonidins were estimated as procyanidin B1 equivalent.

| Name                            | Formula        | Molecular Weight | RT [min] | P1 | P2  | P3  | P4  |
|---------------------------------|----------------|------------------|----------|----|-----|-----|-----|
| Dihydroxybenzoic acid           | C7 H6 O4       | 154.02667        | 10.99    | ND | ND  | ND  | 6   |
| Phenolic acid derivative        | C11 H12 O5     | 224.06867        | 10.99    | ND | ND  | ND  | ND  |
| Phenolic acid derivative        | C11 H12 O6     | 240.06358        | 8.54     | ND | ND  | ND  | ND  |
| Phenolic acid derivative        | C12 H16 O5     | 240.10005        | 9.19     | 1  | 1   | 3   | ND  |
| Phenolic acid derivative        | C13 H20 O4     | 240.13636        | 12.97    | 23 | 12  | 16  | 2   |
| Phenolic acid derivative        | C12 H18 O5     | 242.1157         | 5.86     | 12 | 50  | 12  | 43  |
| Phenolic acid derivative        | C12 H18 O6     | 258.11044        | 5.42     | ND | 1   | ND  | 2   |
| Phenolic acid derivative        | C12 H18 O6     | 258.11047        | 6.24     | ND | ND  | ND  | ND  |
| Phenolic acid derivative        | C12 H14 O7     | 270.07392        | 9.62     | ND | ND  | ND  | ND  |
| Phenolic acid derivative        | C14 H24 O5     | 272.16243        | 10.59    | 2  | ND  | 5   | 1   |
| Phenolic acid derivative        | C14 H24 O5     | 272.1625         | 9.89     | 13 | 4   | 16  | 5   |
| Hydroxybenzoic acid hexoside    | C13 H16 O8     | 300.08462        | 6.40     | ND | 2   | ND  | 8   |
| Hydroxybenzoic acid hexoside    | C13 H16 O8     | 300.08472        | 3.94     | 23 | 134 | 15  | 123 |
| Dihydroxybenzoic acid hexoside  | C13 H16 O9     | 316.07957        | 8.48     | 5  | 5   | 6   | 19  |
| Dihydroxybenzoic acid hexoside  | C13 H16 O9     | 316.07964        | 8.97     | 1  | 7   | ND  | 20  |
| Trihydroxybenzoic acid hexoside | C13 H16 O10    | 332.07459        | 13.38    | ND | 3   | ND  | 19  |
| Phenolic acid deoxyhexoside     | C15 H16 O10    | 356.07484        | 9.66     | ND | ND  | ND  | ND  |
| Phenolic acid derivative        | C15 H18 N O9 P | 387.07262        | 12.08    | ND | 2   | ND  | 1   |
| Hydroxybenzoic acid derivative  | C16 H20 O11    | 388.10104        | 9.22     | 60 | 26  | 147 | 40  |

|                                                      |             |           |       |            |             |            |            |
|------------------------------------------------------|-------------|-----------|-------|------------|-------------|------------|------------|
| Phenolic acid derivative                             | C18 H28 O9  | 388.17373 | 7.18  | 143        | 496         | 80         | 301        |
| Phenolic acid derivative                             | C18 H28 O10 | 404.16868 | 8.59  | 194        | 259         | 172        | 222        |
| Phenolic acid derivative                             | C18 H28 O10 | 404.1687  | 11.13 | 37         | 129         | 51         | 111        |
| 5-O-[B-apiosyl-(1-2)-O-B-xylopyranosyl]gentisic acid | C17 H22 O12 | 418.11142 | 10.98 | ND         | ND          | ND         | ND         |
| Caffeic acid malonyl glucoside                       | C16 H28 O13 | 428.15318 | 2.24  | ND         | ND          | ND         | ND         |
| Hydroxybenzoic acid hexoside pentoside               | C18 H24 O12 | 432.12679 | 5.74  | 2          | 1           | 2          | 2          |
| Dihydroxybenzoic acid pentoside hexoside             | C18 H24 O13 | 448.12215 | 9.43  | ND         | ND          | ND         | ND         |
| Phenolic acid derivative                             | C20 H28 O14 | 492.14852 | 7.91  | ND         | 63          | ND         | 40         |
| Phenolic acid derivative                             | C21 H32 O13 | 492.18471 | 12.43 | ND         | ND          | 6          | ND         |
| Phenolic acid dihexoside derivative                  | C28 H34 O18 | 658.17597 | 6.47  | ND         | ND          | ND         | ND         |
| Phenolic acid dihexoside derivative                  | C29 H36 O18 | 672.19118 | 7.75  | ND         | ND          | ND         | ND         |
| <b>Phenolic acids</b>                                |             |           |       | <b>516</b> | <b>1195</b> | <b>531</b> | <b>965</b> |
| Kaempferol acetyl hexoside                           | C23 H22 O12 | 490.11134 | 16.39 | 1          | 1           | 5          | ND         |
| Kaempferol dihexoside                                | C27 H30 O16 | 610.15424 | 12.47 | 30         | 16          | 17         | 34         |
| Kaempferol malonyl hexoside                          | C24 H22 O14 | 534.10118 | 16.40 | 3          | 4           | 12         | 3          |
| Kaempferol 3-O-sambioside (leucoside)                | C26 H28 O15 | 580.1433  | 13.41 | ND         | 8           | ND         | ND         |
| Kaempferol pentoside-hexoside-deoxyhexoside          | C32 H38 O19 | 726.20143 | 12.95 | ND         | ND          | ND         | ND         |
| Myricetin derivative                                 | C34 H42 O22 | 802.21764 | 11.20 | ND         | ND          | 1          | ND         |
| Myricetin 3-O-glucoside                              | C21 H20 O13 | 480.09095 | 12.36 | ND         | 5           | ND         | 7          |
| Myricetin hexoside deoxyhexoside                     | C27 H30 O17 | 626.14864 | 12.19 | ND         | ND          | ND         | ND         |
| Myricetin hexoside deoxyhexoside                     | C27 H30 O17 | 626.14869 | 12.11 | ND         | ND          | ND         | ND         |
| Myricetin hexoside dideoxyhexoside                   | C33 H40 O21 | 772.20664 | 12.29 | 1365       | 497         | 12         | 1076       |
| Myricetin pentoside-hexoside-deoxyhexoside           | C32 H38 O21 | 758.19094 | 11.32 | ND         | ND          | ND         | ND         |
| Myricetin pentoside-hexoside-deoxyhexoside           | C32 H38 O21 | 758.19098 | 11.55 | ND         | ND          | ND         | ND         |
| Quercetin deoxyhexoside                              | C21 H20 O11 | 448.10092 | 16.75 | ND         | ND          | ND         | ND         |

|                                                                                    |             |            |       |      |     |    |      |
|------------------------------------------------------------------------------------|-------------|------------|-------|------|-----|----|------|
| Quercetin hexoside derivative                                                      | C24 H26 O13 | 522.13792  | 10.21 | ND   | ND  | ND | ND   |
| Quercetin hexoside derivative                                                      | C24 H26 O13 | 522.13791  | 9.48  | ND   | ND  | ND | ND   |
| Quercetin pentoside                                                                | C17 H22 O13 | 434.10639  | 14.31 | ND   | ND  | ND | ND   |
| Quercetin pentoside-hexoside-deoxyhexoside                                         | C32 H38 O20 | 742.19611  | 12.15 | ND   | ND  | ND | ND   |
| Quercetin pentoside-hexoside-deoxyhexoside                                         | C32 H38 O20 | 742.19625  | 12.24 | ND   | ND  | ND | ND   |
| 3,5-Dihydroxy-2-(4-hydroxyphenyl)-4-oxo-3,4-dihydro-2H-chromen-7-yl hexopyranoside | C21 H22 O11 | 450.11658  | 9.89  | 4    | 14  | 5  | 16   |
| Flavonols                                                                          |             |            |       | 1403 | 545 | 52 | 1136 |
| Tricetin hexoside                                                                  | C21 H20 O12 | 464.09605  | 16.75 | ND   | ND  | ND | ND   |
| Tricetin hexoside                                                                  | C21 H20 O12 | 464.09606  | 15.16 | ND   | ND  | ND | 2    |
| Flavones                                                                           |             |            |       | 0    | 0   | 0  | 2    |
| Afzelechin                                                                         | C15 H14 O5  | 274.0845   | 10.29 | ND   | ND  | ND | ND   |
| Epi-afzelechin                                                                     | C15 H14 O5  | 274.08451  | 11.15 | ND   | ND  | ND | ND   |
| (Epi)afzelechin hexoside                                                           | C21 H24 O10 | 436.13738  | 7.70  | ND   | ND  | ND | ND   |
| (Epi)catechin hexoside                                                             | C21 H24 O11 | 452.13217  | 6.59  | ND   | ND  | ND | ND   |
| (Epi)catechin hexoside                                                             | C21 H24 O11 | 452.13245  | 9.34  | ND   | ND  | ND | ND   |
| (Epi)galocatechin hexoside                                                         | C21 H24 O12 | 468.12707  | 4.85  | ND   | ND  | ND | ND   |
| (Epi)galocatechin hexoside                                                         | C21 H24 O12 | 468.12722  | 7.88  | ND   | 16  | ND | 89   |
| Flavan-3-ols                                                                       |             |            |       | 0    | 16  | 0  | 89   |
| AA                                                                                 | C30 H26 O10 | 546.15358  | 11.42 | ND   | ND  | ND | ND   |
| AA                                                                                 | C30 H26 O10 | 546.1536   | 10.35 | ND   | ND  | ND | ND   |
| AC                                                                                 | C30 H26 O11 | 562.148    | 9.14  | ND   | ND  | ND | ND   |
| AAC                                                                                | C45 H38 O16 | 834.2176   | 10.94 | ND   | ND  | ND | ND   |
| ACC                                                                                | C45 H38 O17 | 850.21255  | 10.25 | ND   | ND  | ND | ND   |
| ACC                                                                                | C45 H38 O17 | 850.21255  | 9.91  | ND   | ND  | ND | ND   |
| ACCC                                                                               | C60 H50 O23 | 1138.27613 | 10.61 | ND   | ND  | ND | ND   |
| ACCCC                                                                              | C75 H62 O29 | 1426.3409  | 11.45 | ND   | ND  | ND | ND   |
| Propelargonidins                                                                   |             |            |       | 0    | 0   | 0  | 0    |

|              |              |            |       |    |    |    |    |
|--------------|--------------|------------|-------|----|----|----|----|
| CC           | C30 H26 O12  | 578.14271  | 9.83  | ND | ND | ND | ND |
| CC           | C30 H26 O12  | 578.14298  | 10.40 | ND | ND | ND | ND |
| CC           | C30 H26 O12  | 578.14315  | 11.61 | ND | ND | ND | ND |
| CCC          | C45 H38 O18  | 866.20698  | 10.87 | ND | ND | ND | ND |
| CCC          | C45 H38 O18  | 866.207    | 6.03  | ND | ND | ND | ND |
| CCC          | C45 H38 O18  | 866.20703  | 9.25  | ND | ND | ND | ND |
| CCC          | C45 H38 O18  | 866.20715  | 9.73  | ND | ND | ND | ND |
| CCCC         | C60 H50 O24  | 1154.27068 | 9.84  | ND | ND | ND | ND |
| CCCC         | C60 H50 O24  | 1154.2707  | 9.97  | ND | ND | ND | ND |
| CCCC         | C60 H50 O24  | 1154.27127 | 11.69 | ND | ND | ND | ND |
| CCCCC        | C75 H62 O30  | 1442.33558 | 10.99 | ND | ND | ND | ND |
| CCCCC        | C75 H62 O30  | 1442.33568 | 10.45 | ND | ND | ND | ND |
| CCCCCC       | C90 H74 O36  | 1730.39828 | 11.68 | ND | ND | ND | ND |
| CCCCCC       | C105 H86 O42 | 2018.46508 | 12.00 | ND | ND | ND | ND |
| Procyanidins |              |            |       | 0  | 0  | 0  | 0  |
| GGCCC        | C75 H62 O32  | 1474.32534 | 9.09  | ND | ND | ND | ND |
| GGGGC        | C75 H62 O34  | 1506.31495 | 7.97  | ND | 1  | ND | 1  |
| GC           | C30 H26 O13  | 594.13772  | 8.67  | ND | ND | ND | 2  |
| GC           | C30 H26 O13  | 594.13794  | 7.53  | ND | 2  | ND | 2  |
| GC           | C30 H26 O13  | 594.13794  | 6.68  | ND | ND | ND | 2  |
| GC           | C30 H26 O13  | 594.13794  | 7.22  | ND | 3  | ND | 5  |
| GC           | C30 H26 O13  | 594.13798  | 6.32  | ND | 1  | ND | 2  |
| GC           | C30 H26 O13  | 594.13803  | 9.01  | ND | 9  | ND | 22 |
| GCC          | C45 H38 O19  | 882.20148  | 9.54  | ND | ND | ND | ND |
| GCC          | C45 H38 O19  | 882.20187  | 8.24  | ND | ND | ND | ND |
| GCC          | C45 H38 O19  | 882.2021   | 8.36  | ND | ND | ND | ND |
| GCC          | C45 H38 O19  | 882.20213  | 5.17  | ND | ND | ND | ND |
| GGC          | C45 H38 O20  | 898.19605  | 4.78  | ND | 3  | ND | 4  |
| GGC          | C45 H38 O20  | 898.19622  | 7.43  | ND | 1  | ND | 1  |
| GGC          | C45 H38 O20  | 898.19641  | 7.34  | ND | ND | ND | ND |



|                       |              |            |       |    |      |    |      |
|-----------------------|--------------|------------|-------|----|------|----|------|
| GGC                   | C45 H38 O20  | 898.19674  | 9.98  | ND | ND   | ND | ND   |
| GCCC                  | C60 H50 O25  | 1170.26587 | 9.38  | ND | ND   | ND | ND   |
| GGCC                  | C60 H50 O26  | 1186.26057 | 9.66  | ND | ND   | ND | ND   |
| GGCC                  | C60 H50 O26  | 1186.26075 | 8.56  | ND | ND   | ND | ND   |
| GGGC                  | C60 H50 O27  | 1202.25548 | 7.85  | ND | 2    | ND | 1    |
| GCCCC                 | C75 H62 O31  | 1458.33039 | 10.23 | ND | ND   | ND | ND   |
| GGCCC                 | C75 H62 O32  | 1474.32422 | 10.53 | ND | ND   | ND | ND   |
| GGCCC                 | C75 H62 O32  | 1474.32441 | 9.35  | ND | ND   | ND | ND   |
| GGGCC                 | C75 H62 O33  | 1490.31944 | 8.78  | ND | ND   | ND | ND   |
| GGGCC                 | C75 H62 O33  | 1490.31961 | 9.02  | ND | ND   | ND | ND   |
| GGGGC                 | C75 H62 O34  | 1506.31474 | 8.12  | ND | ND   | ND | ND   |
| GGGGC                 | C75 H62 O34  | 1506.31576 | 8.30  | ND | ND   | ND | ND   |
| GGGCCC                | C90 H74 O39  | 1778.38314 | 9.71  | ND | ND   | ND | ND   |
| GGGGCC                | C90 H74 O40  | 1794.37975 | 9.19  | ND | ND   | ND | ND   |
| GGGGGC                | C90 H74 O41  | 1810.37349 | 8.47  | ND | ND   | ND | ND   |
| GGGCCCC               | C105 H86 O45 | 2066.4502  | 10.55 | ND | ND   | ND | ND   |
| GGGGCCC               | C105 H86 O46 | 2082.44459 | 9.92  | ND | ND   | ND | ND   |
| "G-C"-prodelphinidins |              |            |       | 0  | 22   | 0  | 42   |
| GG                    | C30 H26 O14  | 610.13302  | 6.17  | ND | 294  | ND | 314  |
| GG                    | C30 H26 O14  | 610.13303  | 8.24  | ND | 1153 | ND | 1185 |
| GG                    | C30 H26 O14  | 610.13304  | 4.82  | ND | 221  | ND | 200  |
| GG                    | C30 H26 O14  | 610.13321  | 6.48  | ND | 516  | ND | 379  |
| GG-deoxyhexoside      | C33 H40 O20  | 756.21216  | 13.14 | ND | ND   | ND | ND   |
| GGG                   | C45 H38 O21  | 914.1916   | 7.72  | ND | 493  | ND | 573  |
| GGG                   | C45 H38 O21  | 914.19169  | 6.63  | ND | 466  | ND | 346  |
| GGG                   | C45 H38 O21  | 914.19184  | 4.37  | ND | 289  | ND | 189  |
| GGG                   | C45 H38 O21  | 914.19192  | 7.82  | ND | 24   | ND | 188  |
| GGGG                  | C60 H50 O28  | 1218.2508  | 7.33  | ND | 242  | ND | 147  |
| GGGG                  | C60 H50 O28  | 1218.25088 | 9.58  | ND | 220  | ND | 243  |
| GGGGG                 | C75 H62 O35  | 1522.3086  | 10.05 | ND | 127  | ND | 216  |

|                                                                                 |              |            |      |    |      |    |      |
|---------------------------------------------------------------------------------|--------------|------------|------|----|------|----|------|
| GGGGG                                                                           | C75 H62 O35  | 1522.30948 | 7.66 | ND | 194  | ND | 126  |
| GGGGGG                                                                          | C90 H74 O42  | 1826.36757 | 8.90 | ND | 289  | ND | 198  |
| GGGGGGG                                                                         | C105 H86 O49 | 2130.43022 | 9.17 | ND | 262  | ND | 131  |
| "G"-prodelphinidins                                                             |              |            |      | 0  | 4790 | 0  | 4435 |
| Delphinidin 3-O-(2-O- $\beta$ -d-Glucopyranosyl- $\alpha$ -l-arabinopyranoside) | C26 H28 O16  | 596.13879  | 6.68 | ND | ND   | ND | ND   |
| Anthocyanins                                                                    |              |            |      | 0  | 0    | 0  | 0    |

**Table S12.** Estimated amounts ( $\mu\text{mol/g}$ ) of major polyphenols detected in chickpea seed coats by the untargeted method and not quantified in Table 7. Vanillic acid 4- $\beta$ -D-glucoside was used to estimate the amounts of phenolic acids, whereas kaempferol 3-O-rutinoside, quercetin 3-O-rhamnoside, myricetin 3-O-rhamnoside, luteolin 4'-O-glucoside and delphinidin 3- $\beta$ -D-glucoside were used to estimate the amounts of kaempferol, quercetin and myricetin compounds, flavones and anthocyanins, respectively. Flavan-3-ols were estimated as catechin equivalents, while procyanidins, prodelphinidins and propelargonidins were estimated as procyanidin B1 equivalent.

| Name                            | Formula        | Molecular Weight | RT [min] | C1   | C2  | C3   | C4  |
|---------------------------------|----------------|------------------|----------|------|-----|------|-----|
| Dihydroxybenzoic acid           | C7 H6 O4       | 154.02667        | 10.99    | 32   | 398 | 139  | 23  |
| Phenolic acid derivative        | C11 H12 O5     | 224.06867        | 10.99    | ND   | ND  | ND   | ND  |
| Phenolic acid derivative        | C11 H12 O6     | 240.06358        | 8.54     | ND   | ND  | ND   | ND  |
| Phenolic acid derivative        | C12 H16 O5     | 240.10005        | 9.19     | 1    | ND  | ND   | ND  |
| Phenolic acid derivative        | C13 H20 O4     | 240.13636        | 12.97    | ND   | ND  | ND   | ND  |
| Phenolic acid derivative        | C12 H18 O5     | 242.1157         | 5.86     | ND   | 2   | 2    | 2   |
| Phenolic acid derivative        | C12 H18 O6     | 258.11044        | 5.42     | ND   | ND  | ND   | ND  |
| Phenolic acid derivative        | C12 H18 O6     | 258.11047        | 6.24     | ND   | ND  | ND   | ND  |
| Phenolic acid derivative        | C12 H14 O7     | 270.07392        | 9.62     | ND   | ND  | ND   | ND  |
| Phenolic acid derivative        | C14 H24 O5     | 272.16243        | 10.59    | 3    | 5   | 8    | 3   |
| Phenolic acid derivative        | C14 H24 O5     | 272.1625         | 9.89     | 7    | 8   | 10   | 5   |
| Hydroxybenzoic acid hexoside    | C13 H16 O8     | 300.08462        | 6.40     | ND   | ND  | 3    | ND  |
| Hydroxybenzoic acid hexoside    | C13 H16 O8     | 300.08472        | 3.94     | 264  | 13  | 48   | 25  |
| Dihydroxybenzoic acid hexoside  | C13 H16 O9     | 316.07957        | 8.48     | 1306 | 527 | 1836 | 758 |
| Dihydroxybenzoic acid hexoside  | C13 H16 O9     | 316.07964        | 8.97     | 170  | 36  | 455  | 103 |
| Trihydroxybenzoic acid hexoside | C13 H16 O10    | 332.07459        | 13.38    | 70   | 33  | 672  | 123 |
| Phenolic acid deoxyhexoside     | C15 H16 O10    | 356.07484        | 9.66     | ND   | ND  | ND   | ND  |
| Phenolic acid derivative        | C15 H18 N O9 P | 387.07262        | 12.08    | ND   | ND  | ND   | ND  |
| Hydroxybenzoic acid derivative  | C16 H20 O11    | 388.10104        | 9.22     | 109  | 13  | 12   | 7   |

|                                                      |             |           |       |             |             |             |             |
|------------------------------------------------------|-------------|-----------|-------|-------------|-------------|-------------|-------------|
| Phenolic acid derivative                             | C18 H28 O9  | 388.17373 | 7.18  | 27          | 8           | 29          | 24          |
| Phenolic acid derivative                             | C18 H28 O10 | 404.16868 | 8.59  | ND          | ND          | ND          | ND          |
| Phenolic acid derivative                             | C18 H28 O10 | 404.1687  | 11.13 | ND          | ND          | ND          | ND          |
| 5-O-[B-apiosyl-(1-2)-O-B-xylopyranosyl]gentisic acid | C17 H22 O12 | 418.11142 | 10.98 | ND          | ND          | ND          | ND          |
| Caffeic acid malonyl glucoside                       | C16 H28 O13 | 428.15318 | 2.24  | ND          | ND          | ND          | ND          |
| Hydroxybenzoic acid hexoside pentoside               | C18 H24 O12 | 432.12679 | 5.74  | 1382        | 244         | 407         | 329         |
| Dihydroxybenzoic acid pentoside hexoside             | C18 H24 O13 | 448.12215 | 9.43  | 260         | 77          | 138         | 96          |
| Phenolic acid derivative                             | C20 H28 O14 | 492.14852 | 7.91  | ND          | ND          | ND          | ND          |
| Phenolic acid derivative                             | C21 H32 O13 | 492.18471 | 12.43 | 90          | 92          | 74          | 51          |
| Phenolic acid dihexoside derivative                  | C28 H34 O18 | 658.17597 | 6.47  | ND          | ND          | ND          | ND          |
| Phenolic acid dihexoside derivative                  | C29 H36 O18 | 672.19118 | 7.75  | ND          | ND          | ND          | ND          |
| <b>Phenolic acids</b>                                |             |           |       | <b>3721</b> | <b>1456</b> | <b>3833</b> | <b>1549</b> |
| Kaempferol acetyl hexoside                           | C23 H22 O12 | 490.11134 | 16.39 | 61          | 20          | 25          | 30          |
| Kaempferol dihexoside                                | C27 H30 O16 | 610.15424 | 12.47 | 8           | 24          | 18          | 13          |
| Kaempferol malonyl hexoside                          | C24 H22 O14 | 534.10118 | 16.40 | 148         | 53          | 63          | 77          |
| Kaempferol 3-O-sambioside (leucoside)                | C26 H28 O15 | 580.1433  | 13.41 | 1           | 5           | 5           | 4           |
| Kaempferol pentoside-hexoside-deoxyhexoside          | C32 H38 O19 | 726.20143 | 12.95 | 64          | 2675        | 3507        | 2586        |
| Myricetin derivative                                 | C34 H42 O22 | 802.21764 | 11.20 | ND          | 1465        | 897         | 752         |
| Myricetin 3-O-glucoside                              | C21 H20 O13 | 480.09095 | 12.36 | ND          | 69          | 108         | 43          |
| Myricetin hexoside deoxyhexoside                     | C27 H30 O17 | 626.14864 | 12.19 | ND          | 1764        | 2639        | 2894        |
| Myricetin hexoside deoxyhexoside                     | C27 H30 O17 | 626.14869 | 12.11 | ND          | 3773        | 1725        | 1166        |
| Myricetin hexoside dideoxyhexoside                   | C33 H40 O21 | 772.20664 | 12.29 | 24          | 7512        | 6787        | 6165        |
| Myricetin pentoside-hexoside-deoxyhexoside           | C32 H38 O21 | 758.19094 | 11.32 | ND          | 544         | 967         | 1150        |
| Myricetin pentoside-hexoside-deoxyhexoside           | C32 H38 O21 | 758.19098 | 11.55 | ND          | 4175        | 4025        | 3636        |
| Quercetin deoxyhexoside                              | C21 H20 O11 | 448.10092 | 16.75 | ND          | ND          | ND          | ND          |
| Quercetin hexoside derivative                        | C24 H26 O13 | 522.13792 | 10.21 | ND          | ND          | ND          | ND          |
| Quercetin hexoside derivative                        | C24 H26 O13 | 522.13791 | 9.48  | 3           | ND          | ND          | ND          |
| Quercetin pentoside                                  | C17 H22 O13 | 434.10639 | 14.31 | ND          | ND          | ND          | ND          |

|                                                                                    |             |            |       |     |       |       |       |
|------------------------------------------------------------------------------------|-------------|------------|-------|-----|-------|-------|-------|
| Quercetin pentoside-hexoside-deoxyhexoside                                         | C32 H38 O20 | 742.19611  | 12.15 | ND  | 48    | 131   | 125   |
| Quercetin-pentoside-hexoside-deoxyhexoside                                         | C32 H38 O20 | 742.19625  | 12.24 | ND  | 217   | 314   | 193   |
| 3,5-Dihydroxy-2-(4-hydroxyphenyl)-4-oxo-3,4-dihydro-2H-chromen-7-yl hexopyranoside | C21 H22 O11 | 450.11658  | 9.89  | 7   | 4     | 33    | 18    |
| Flavonols                                                                          |             |            |       | 316 | 22348 | 21244 | 18852 |
| Tricetin hexoside                                                                  | C21 H20 O12 | 464.09605  | 16.75 | ND  | ND    | ND    | ND    |
| Tricetin hexoside                                                                  | C21 H20 O12 | 464.09606  | 15.16 | ND  | ND    | ND    | ND    |
| Flavones                                                                           |             |            |       | 0   | 0     | 0     | 0     |
| Afzelechin                                                                         | C15 H14 O5  | 274.0845   | 10.29 | ND  | ND    | ND    | ND    |
| Epi-afzelechin                                                                     | C15 H14 O5  | 274.08451  | 11.15 | ND  | ND    | ND    | ND    |
| (Epi)afzelechin hexoside                                                           | C21 H24 O10 | 436.13738  | 7.70  | ND  | ND    | ND    | ND    |
| (Epi)catechin hexoside                                                             | C21 H24 O11 | 452.13217  | 6.59  | ND  | ND    | ND    | ND    |
| (Epi)catechin hexoside                                                             | C21 H24 O11 | 452.13245  | 9.34  | ND  | ND    | ND    | ND    |
| (Epi)gallocatechin hexoside                                                        | C21 H24 O12 | 468.12707  | 4.85  | ND  | ND    | ND    | ND    |
| (Epi)gallocatechin hexoside                                                        | C21 H24 O12 | 468.12722  | 7.88  | ND  | 4     | ND    | ND    |
| Flavan-3-ols                                                                       |             |            |       | 0   | 4     | 0     | 0     |
| AA                                                                                 | C30 H26 O10 | 546.15358  | 11.42 | ND  | ND    | ND    | ND    |
| AA                                                                                 | C30 H26 O10 | 546.1536   | 10.35 | ND  | ND    | ND    | ND    |
| AC                                                                                 | C30 H26 O11 | 562.148    | 9.14  | ND  | ND    | ND    | ND    |
| AAC                                                                                | C45 H38 O16 | 834.2176   | 10.94 | ND  | ND    | ND    | ND    |
| ACC                                                                                | C45 H38 O17 | 850.21255  | 10.25 | ND  | ND    | ND    | ND    |
| ACC                                                                                | C45 H38 O17 | 850.21255  | 9.91  | ND  | ND    | ND    | ND    |
| ACCC                                                                               | C60 H50 O23 | 1138.27613 | 10.61 | ND  | ND    | ND    | ND    |
| ACCCC                                                                              | C75 H62 O29 | 1426.3409  | 11.45 | ND  | ND    | ND    | ND    |
| Propelargonidins                                                                   |             |            |       | 0   | 0     | 0     | 0     |
| CC                                                                                 | C30 H26 O12 | 578.14271  | 9.83  | ND  | ND    | ND    | ND    |
| CC                                                                                 | C30 H26 O12 | 578.14298  | 10.40 | ND  | ND    | ND    | ND    |
| CC                                                                                 | C30 H26 O12 | 578.14315  | 11.61 | ND  | ND    | ND    | ND    |
| CCC                                                                                | C45 H38 O18 | 866.20698  | 10.87 | ND  | ND    | ND    | ND    |

|              |              |            |       |    |    |    |    |
|--------------|--------------|------------|-------|----|----|----|----|
| CCC          | C45 H38 O18  | 866.207    | 6.03  | ND | ND | ND | ND |
| CCC          | C45 H38 O18  | 866.20703  | 9.25  | ND | ND | ND | ND |
| CCC          | C45 H38 O18  | 866.20715  | 9.73  | ND | ND | ND | ND |
| CCCC         | C60 H50 O24  | 1154.27068 | 9.84  | ND | ND | ND | ND |
| CCCC         | C60 H50 O24  | 1154.2707  | 9.97  | ND | ND | ND | ND |
| CCCC         | C60 H50 O24  | 1154.27127 | 11.69 | ND | ND | ND | ND |
| CCCCC        | C75 H62 O30  | 1442.33558 | 10.99 | ND | ND | ND | ND |
| CCCCC        | C75 H62 O30  | 1442.33568 | 10.45 | ND | ND | ND | ND |
| CCCCCC       | C90 H74 O36  | 1730.39828 | 11.68 | ND | ND | ND | ND |
| CCCCCCC      | C105 H86 O42 | 2018.46508 | 12.00 | ND | ND | ND | ND |
| Procyanidins |              |            |       | 0  | 0  | 0  | 0  |
| GGCCC        | C75 H62 O32  | 1474.32534 | 9.09  | ND | ND | ND | ND |
| GGGGC        | C75 H62 O34  | 1506.31495 | 7.97  | ND | ND | ND | ND |
| GC           | C30 H26 O13  | 594.13772  | 8.67  | ND | ND | ND | ND |
| GC           | C30 H26 O13  | 594.13794  | 7.53  | ND | ND | 1  | ND |
| GC           | C30 H26 O13  | 594.13794  | 6.68  | ND | ND | ND | ND |
| GC           | C30 H26 O13  | 594.13794  | 7.22  | ND | ND | ND | ND |
| GC           | C30 H26 O13  | 594.13798  | 6.32  | ND | ND | ND | ND |
| GC           | C30 H26 O13  | 594.13803  | 9.01  | ND | ND | ND | ND |
| GCC          | C45 H38 O19  | 882.20148  | 9.54  | ND | ND | ND | ND |
| GCC          | C45 H38 O19  | 882.20187  | 8.24  | ND | ND | ND | ND |
| GCC          | C45 H38 O19  | 882.2021   | 8.36  | ND | ND | ND | ND |
| GCC          | C45 H38 O19  | 882.20213  | 5.17  | ND | ND | ND | ND |
| GGC          | C45 H38 O20  | 898.19605  | 4.78  | ND | ND | ND | ND |
| GGC          | C45 H38 O20  | 898.19622  | 7.43  | ND | ND | ND | ND |
| GGC          | C45 H38 O20  | 898.19641  | 7.34  | ND | ND | ND | ND |
| GGC          | C45 H38 O20  | 898.19674  | 9.98  | ND | ND | ND | ND |
| GCCC         | C60 H50 O25  | 1170.26587 | 9.38  | ND | ND | ND | ND |
| GGCC         | C60 H50 O26  | 1186.26057 | 9.66  | ND | ND | ND | ND |
| GGCC         | C60 H50 O26  | 1186.26075 | 8.56  | ND | ND | ND | ND |

|                       |              |            |       |    |     |     |     |
|-----------------------|--------------|------------|-------|----|-----|-----|-----|
| GGGC                  | C60 H50 O27  | 1202.25548 | 7.85  | ND | ND  | ND  | ND  |
| GCCCC                 | C75 H62 O31  | 1458.33039 | 10.23 | ND | ND  | ND  | ND  |
| GGCCC                 | C75 H62 O32  | 1474.32422 | 10.53 | ND | ND  | ND  | ND  |
| GGCCC                 | C75 H62 O32  | 1474.32441 | 9.35  | ND | ND  | ND  | ND  |
| GGGCC                 | C75 H62 O33  | 1490.31944 | 8.78  | ND | ND  | ND  | ND  |
| GGGCC                 | C75 H62 O33  | 1490.31961 | 9.02  | ND | ND  | ND  | ND  |
| GGGGC                 | C75 H62 O34  | 1506.31474 | 8.12  | ND | ND  | 1   | ND  |
| GGGGC                 | C75 H62 O34  | 1506.31576 | 8.30  | ND | ND  | ND  | ND  |
| GGGCCC                | C90 H74 O39  | 1778.38314 | 9.71  | ND | ND  | ND  | ND  |
| GGGGCC                | C90 H74 O40  | 1794.37975 | 9.19  | ND | ND  | ND  | ND  |
| GGGGGC                | C90 H74 O41  | 1810.37349 | 8.47  | ND | ND  | ND  | ND  |
| GGGCCCC               | C105 H86 O45 | 2066.4502  | 10.55 | ND | ND  | ND  | ND  |
| GGGGCCC               | C105 H86 O46 | 2082.44459 | 9.92  | ND | ND  | ND  | ND  |
| "G-C"-prodelphinidins |              |            |       | 0  | 0   | 2   | 0   |
| GG                    | C30 H26 O14  | 610.13302  | 6.17  | ND | ND  | ND  | ND  |
| GG                    | C30 H26 O14  | 610.13303  | 8.24  | ND | 1   | 1   | 1   |
| GG                    | C30 H26 O14  | 610.13304  | 4.82  | ND | 2   | 2   | 3   |
| GG                    | C30 H26 O14  | 610.13321  | 6.48  | ND | 94  | 125 | 135 |
| GG-deoxyhexoside      | C33 H40 O20  | 756.21216  | 13.14 | 1  | 313 | 352 | 254 |
| GGG                   | C45 H38 O21  | 914.1916   | 7.72  | ND | ND  | 1   | 1   |
| GGG                   | C45 H38 O21  | 914.19169  | 6.63  | ND | 79  | 105 | 110 |
| GGG                   | C45 H38 O21  | 914.19184  | 4.37  | ND | ND  | ND  | ND  |
| GGG                   | C45 H38 O21  | 914.19192  | 7.82  | ND | ND  | ND  | ND  |
| GGGG                  | C60 H50 O28  | 1218.2508  | 7.33  | ND | 114 | 143 | 148 |
| GGGG                  | C60 H50 O28  | 1218.25088 | 9.58  | ND | 9   | 13  | 12  |
| GGGGG                 | C75 H62 O35  | 1522.3086  | 10.05 | ND | 15  | 19  | 12  |
| GGGGG                 | C75 H62 O35  | 1522.30948 | 7.66  | ND | 131 | 168 | 164 |
| GGGGGG                | C90 H74 O42  | 1826.36757 | 8.90  | ND | 2   | 3   | 2   |
| GGGGGGG               | C105 H86 O49 | 2130.43022 | 9.17  | ND | 2   | 6   | 2   |
| "G"-prodelphinidins   |              |            |       | 1  | 762 | 938 | 844 |

|                                                                |             |           |      |    |    |    |    |
|----------------------------------------------------------------|-------------|-----------|------|----|----|----|----|
| Delphinidin 3-O-(2-O-β-d-Glucopyranosyl-α-l-arabinopyranoside) | C26 H28 O16 | 596.13879 | 6.68 | ND | ND | ND | ND |
| Anthocyanins                                                   |             |           |      | 0  | 0  | 0  | 0  |



**Table S13.** Estimated amounts ( $\mu\text{mol/g}$ ) of major polyphenols detected in faba bean seed coats by the untargeted method and not quantified in Table 8. Vanillic acid 4- $\beta$ -D-glucoside was used to estimate the amounts of phenolic acids, whereas kaempferol 3-O-rutinoside, quercetin 3-O-rhamnoside, myricetin 3-O-rhamnoside, luteolin 4'-O-glucoside and delphinidin 3- $\beta$ -D-glucoside were used to estimate the amounts of kaempferol, quercetin and myricetin compounds, flavones and anthocyanins, respectively. Flavan-3-ols were estimated as catechin equivalents, while procyanidins, prodelphinidins and propelargonidins were estimated as procyanidin B1 equivalent.

| Name                            | Formula        | Molecular Weight | RT [min] | F1   | F2   | F3   | F4   |
|---------------------------------|----------------|------------------|----------|------|------|------|------|
| Dihydroxybenzoic acid           | C7 H6 O4       | 154.02667        | 10.99    | 1    | ND   | 3    | ND   |
| Phenolic acid derivative        | C11 H12 O5     | 224.06867        | 10.99    | 6    | 354  | 54   | 130  |
| Phenolic acid derivative        | C11 H12 O6     | 240.06358        | 8.54     | 200  | 227  | 369  | 298  |
| Phenolic acid derivative        | C12 H16 O5     | 240.10005        | 9.19     | 72   | 61   | 293  | 262  |
| Phenolic acid derivative        | C13 H20 O4     | 240.13636        | 12.97    | ND   | ND   | ND   | ND   |
| Phenolic acid derivative        | C12 H18 O5     | 242.1157         | 5.86     | 120  | 147  | 116  | 138  |
| Phenolic acid derivative        | C12 H18 O6     | 258.11044        | 5.42     | 56   | 141  | 97   | 91   |
| Phenolic acid derivative        | C12 H18 O6     | 258.11047        | 6.24     | 620  | 476  | 392  | 316  |
| Phenolic acid derivative        | C12 H14 O7     | 270.07392        | 9.62     | 1271 | 1830 | 1437 | 1458 |
| Phenolic acid derivative        | C14 H24 O5     | 272.16243        | 10.59    | 3    | 5    | 5    | 2    |
| Phenolic acid derivative        | C14 H24 O5     | 272.1625         | 9.89     | 28   | 31   | 28   | 14   |
| Hydroxybenzoic acid hexoside    | C13 H16 O8     | 300.08462        | 6.40     | ND   | ND   | 6    | ND   |
| Hydroxybenzoic acid hexoside    | C13 H16 O8     | 300.08472        | 3.94     | 8    | 28   | 74   | 19   |
| Dihydroxybenzoic acid hexoside  | C13 H16 O9     | 316.07957        | 8.48     | 14   | 3    | 43   | 9    |
| Dihydroxybenzoic acid hexoside  | C13 H16 O9     | 316.07964        | 8.97     | 2    | 2    | 12   | 3    |
| Trihydroxybenzoic acid hexoside | C13 H16 O10    | 332.07459        | 13.38    | ND   | ND   | 8    | 2    |
| Phenolic acid deoxyhexoside     | C15 H16 O10    | 356.07484        | 9.66     | ND   | ND   | ND   | ND   |
| Phenolic acid derivative        | C15 H18 N O9 P | 387.07262        | 12.08    | 141  | 366  | 438  | 356  |
| Hydroxybenzoic acid derivative  | C16 H20 O11    | 388.10104        | 9.22     | ND   | ND   | ND   | ND   |

|                                                      |             |           |       |             |             |             |             |
|------------------------------------------------------|-------------|-----------|-------|-------------|-------------|-------------|-------------|
| Phenolic acid derivative                             | C18 H28 O9  | 388.17373 | 7.18  | 206         | 275         | 236         | 231         |
| Phenolic acid derivative                             | C18 H28 O10 | 404.16868 | 8.59  | 44          | 8           | 41          | 19          |
| Phenolic acid derivative                             | C18 H28 O10 | 404.1687  | 11.13 | 254         | 195         | 258         | 209         |
| 5-O-[B-apiosyl-(1-2)-O-B-xylopyranosyl]gentisic acid | C17 H22 O12 | 418.11142 | 10.98 | ND          | ND          | ND          | ND          |
| Caffeic acid malonyl glucoside                       | C16 H28 O13 | 428.15318 | 2.24  | 68          | 231         | 321         | 335         |
| Hydroxybenzoic acid hexoside pentoside               | C18 H24 O12 | 432.12679 | 5.74  | ND          | ND          | ND          | ND          |
| Dihydroxybenzoic acid pentoside hexoside             | C18 H24 O13 | 448.12215 | 9.43  | ND          | 8           | 156         | 179         |
| Phenolic acid derivative                             | C20 H28 O14 | 492.14852 | 7.91  | 1           | 15          | 91          | 122         |
| Phenolic acid derivative                             | C21 H32 O13 | 492.18471 | 12.43 | ND          | ND          | ND          | ND          |
| Phenolic acid dihexoside derivative                  | C28 H34 O18 | 658.17597 | 6.47  | ND          | ND          | ND          | ND          |
| Phenolic acid dihexoside derivative                  | C29 H36 O18 | 672.19118 | 7.75  | ND          | ND          | ND          | ND          |
| <b>Phenolic acids</b>                                |             |           |       | <b>3115</b> | <b>4403</b> | <b>4478</b> | <b>4193</b> |
| Kaempferol acetyl hexoside                           | C23 H22 O12 | 490.11134 | 16.39 | ND          | 5           | ND          | ND          |
| Kaempferol dihexoside                                | C27 H30 O16 | 610.15424 | 12.47 | 402         | 3           | 2           | 6           |
| Kaempferol malonyl hexoside                          | C24 H22 O14 | 534.10118 | 16.40 | 1           | 13          | 1           | 2           |
| Kaempferol 3-O-sambioside (leucoside)                | C26 H28 O15 | 580.1433  | 13.41 | 3           | 8           | 2           | 4           |
| Kaempferol pentoside-hexoside-deoxyhexoside          | C32 H38 O19 | 726.20143 | 12.95 | 4           | ND          | ND          | ND          |
| Myricetin derivative                                 | C34 H42 O22 | 802.21764 | 11.20 | ND          | ND          | ND          | ND          |
| Myricetin 3-O-glucoside                              | C21 H20 O13 | 480.09095 | 12.36 | 23          | 58          | 13          | 57          |
| Myricetin hexoside deoxyhexoside                     | C27 H30 O17 | 626.14864 | 12.19 | 1           | 5           | 212         | 2           |
| Myricetin hexoside deoxyhexoside                     | C27 H30 O17 | 626.14869 | 12.11 | 24          | 8           | 90          | 187         |
| Myricetin hexoside dideoxyhexoside                   | C33 H40 O21 | 772.20664 | 12.29 | 1           | ND          | ND          | ND          |
| Myricetin pentoside-hexoside-deoxyhexoside           | C32 H38 O21 | 758.19094 | 11.32 | ND          | ND          | ND          | ND          |
| Myricetin pentoside-hexoside-deoxyhexoside           | C32 H38 O21 | 758.19098 | 11.55 | ND          | ND          | ND          | ND          |
| Quercetin deoxyhexoside                              | C21 H20 O11 | 448.10092 | 16.75 | 118         | 12          | 4           | 4           |

|                                                                                    |             |            |       |     |     |     |     |
|------------------------------------------------------------------------------------|-------------|------------|-------|-----|-----|-----|-----|
| Quercetin hexoside derivative                                                      | C24 H26 O13 | 522.13792  | 10.21 | ND  | ND  | ND  | ND  |
| Quercetin hexoside derivative                                                      | C24 H26 O13 | 522.13791  | 9.48  | ND  | ND  | ND  | ND  |
| Quercetin pentoside                                                                | C17 H22 O13 | 434.10639  | 14.31 | ND  | ND  | ND  | ND  |
| Quercetin pentoside-hexoside-deoxyhexoside                                         | C32 H38 O20 | 742.19611  | 12.15 | ND  | ND  | ND  | ND  |
| Quercetin pentoside-hexoside-deoxyhexoside                                         | C32 H38 O20 | 742.19625  | 12.24 | ND  | ND  | ND  | ND  |
| 3,5-Dihydroxy-2-(4-hydroxyphenyl)-4-oxo-3,4-dihydro-2H-chromen-7-yl hexopyranoside | C21 H22 O11 | 450.11658  | 9.89  | ND  | 1   | ND  | ND  |
| Flavonols                                                                          |             |            |       | 577 | 113 | 324 | 262 |
| Tricetin hexoside                                                                  | C21 H20 O12 | 464.09605  | 16.75 | 3   | ND  | ND  | ND  |
| Tricetin hexoside                                                                  | C21 H20 O12 | 464.09606  | 15.16 | ND  | 9   | 6   | 9   |
| Flavones                                                                           |             |            |       | 3   | 9   | 6   | 9   |
| Afzelechin                                                                         | C15 H14 O5  | 274.0845   | 10.29 | ND  | ND  | ND  | ND  |
| Epi-afzelechin                                                                     | C15 H14 O5  | 274.08451  | 11.15 | ND  | ND  | 3   | 2   |
| (Epi)afzelechin hexoside                                                           | C21 H24 O10 | 436.13738  | 7.70  | ND  | ND  | ND  | ND  |
| (Epi)catechin hexoside                                                             | C21 H24 O11 | 452.13217  | 6.59  | ND  | 1   | 5   | 5   |
| (Epi)catechin hexoside                                                             | C21 H24 O11 | 452.13245  | 9.34  | ND  | 11  | 227 | 256 |
| (Epi)gallocatechin hexoside                                                        | C21 H24 O12 | 468.12707  | 4.85  | ND  | ND  | ND  | ND  |
| (Epi)gallocatechin hexoside                                                        | C21 H24 O12 | 468.12722  | 7.88  | ND  | 25  | 220 | 138 |
| Flavan-3-ols                                                                       |             |            |       | 0   | 37  | 455 | 401 |
| AA                                                                                 | C30 H26 O10 | 546.15358  | 11.42 | ND  | ND  | ND  | ND  |
| AA                                                                                 | C30 H26 O10 | 546.1536   | 10.35 | ND  | ND  | ND  | ND  |
| AC                                                                                 | C30 H26 O11 | 562.148    | 9.14  | ND  | 1   | 8   | 6   |
| AAC                                                                                | C45 H38 O16 | 834.2176   | 10.94 | ND  | ND  | ND  | ND  |
| ACC                                                                                | C45 H38 O17 | 850.21255  | 10.25 | ND  | ND  | 1   | ND  |
| ACC                                                                                | C45 H38 O17 | 850.21255  | 9.91  | ND  | ND  | 1   | 1   |
| ACCC                                                                               | C60 H50 O23 | 1138.27613 | 10.61 | ND  | ND  | ND  | ND  |
| ACCCC                                                                              | C75 H62 O29 | 1426.3409  | 11.45 | ND  | ND  | ND  | 1   |
| Propelargonidins                                                                   |             |            |       | 0   | 1   | 10  | 8   |

|              |              |            |       |    |     |     |     |
|--------------|--------------|------------|-------|----|-----|-----|-----|
| CC           | C30 H26 O12  | 578.14271  | 9.83  | ND | 31  | 377 | 269 |
| CC           | C30 H26 O12  | 578.14298  | 10.40 | ND | 6   | 47  | 41  |
| CC           | C30 H26 O12  | 578.14315  | 11.61 | ND | 8   | 75  | 66  |
| CCC          | C45 H38 O18  | 866.20698  | 10.87 | ND | 2   | 26  | 20  |
| CCC          | C45 H38 O18  | 866.207    | 6.03  | ND | 28  | 171 | 182 |
| CCC          | C45 H38 O18  | 866.20703  | 9.25  | ND | 21  | 110 | 119 |
| CCC          | C45 H38 O18  | 866.20715  | 9.73  | ND | 5   | 38  | 43  |
| CCCC         | C60 H50 O24  | 1154.27068 | 9.84  | ND | ND  | 3   | 3   |
| CCCC         | C60 H50 O24  | 1154.2707  | 9.97  | ND | ND  | 5   | 9   |
| CCCC         | C60 H50 O24  | 1154.27127 | 11.69 | ND | 11  | 94  | 89  |
| CCCCC        | C75 H62 O30  | 1442.33558 | 10.99 | ND | ND  | 7   | 9   |
| CCCCC        | C75 H62 O30  | 1442.33568 | 10.45 | ND | ND  | 7   | 11  |
| CCCCCC       | C90 H74 O36  | 1730.39828 | 11.68 | ND | ND  | 8   | 7   |
| CCCCCCC      | C105 H86 O42 | 2018.46508 | 12.00 | ND | ND  | ND  | 1   |
| Procyanidins |              |            |       | 0  | 112 | 968 | 869 |
| GGCCC        | C75 H62 O32  | 1474.32534 | 9.09  | ND | 4   | 16  | 22  |
| GGGGC        | C75 H62 O34  | 1506.31495 | 7.97  | ND | 97  | 127 | 117 |
| GC           | C30 H26 O13  | 594.13772  | 8.67  | ND | 1   | 141 | 142 |
| GC           | C30 H26 O13  | 594.13794  | 7.53  | ND | 207 | 754 | 641 |
| GC           | C30 H26 O13  | 594.13794  | 6.68  | ND | 19  | 95  | 70  |
| GC           | C30 H26 O13  | 594.13794  | 7.22  | ND | 39  | 348 | 189 |
| GC           | C30 H26 O13  | 594.13798  | 6.32  | ND | 83  | 457 | 412 |
| GC           | C30 H26 O13  | 594.13803  | 9.01  | ND | 169 | 674 | 355 |
| GCC          | C45 H38 O19  | 882.20148  | 9.54  | ND | 2   | 11  | 8   |
| GCC          | C45 H38 O19  | 882.20187  | 8.24  | ND | 25  | 108 | 119 |
| GCC          | C45 H38 O19  | 882.2021   | 8.36  | ND | 71  | 263 | 276 |
| GCC          | C45 H38 O19  | 882.20213  | 5.17  | ND | 49  | 237 | 201 |
| GGC          | C45 H38 O20  | 898.19605  | 4.78  | ND | 88  | 228 | 158 |
| GGC          | C45 H38 O20  | 898.19622  | 7.43  | ND | 111 | 152 | 161 |
| GGC          | C45 H38 O20  | 898.19641  | 7.34  | ND | 19  | 109 | 52  |

|                       |              |            |       |    |      |      |      |
|-----------------------|--------------|------------|-------|----|------|------|------|
| GGC                   | C45 H38 O20  | 898.19674  | 9.98  | ND | 60   | 95   | 100  |
| GCCC                  | C60 H50 O25  | 1170.26587 | 9.38  | ND | 5    | 21   | 20   |
| GGCC                  | C60 H50 O26  | 1186.26057 | 9.66  | ND | 7    | 3    | 5    |
| GGCC                  | C60 H50 O26  | 1186.26075 | 8.56  | ND | 12   | 20   | 29   |
| GGGC                  | C60 H50 O27  | 1202.25548 | 7.85  | ND | 94   | 67   | 86   |
| GCCCC                 | C75 H62 O31  | 1458.33039 | 10.23 | ND | ND   | 6    | 6    |
| GGCCC                 | C75 H62 O32  | 1474.32422 | 10.53 | ND | 3    | 13   | 8    |
| GGCCC                 | C75 H62 O32  | 1474.32441 | 9.35  | ND | 16   | 44   | 59   |
| GGGCC                 | C75 H62 O33  | 1490.31944 | 8.78  | ND | 1    | 4    | 2    |
| GGGCC                 | C75 H62 O33  | 1490.31961 | 9.02  | ND | 48   | 111  | 141  |
| GGGGC                 | C75 H62 O34  | 1506.31474 | 8.12  | ND | 97   | 13   | 13   |
| GGGGC                 | C75 H62 O34  | 1506.31576 | 8.30  | ND | 23   | 7    | 5    |
| GGGCCC                | C90 H74 O39  | 1778.38314 | 9.71  | ND | 5    | 11   | 14   |
| GGGGCC                | C90 H74 O40  | 1794.37975 | 9.19  | ND | 10   | 18   | 20   |
| GGGGGC                | C90 H74 O41  | 1810.37349 | 8.47  | ND | 3    | 3    | 7    |
| GGGCCCC               | C105 H86 O45 | 2066.4502  | 10.55 | ND | 1    | 6    | 7    |
| GGGGCCC               | C105 H86 O46 | 2082.44459 | 9.92  | ND | 4    | 12   | 11   |
| "G-C"-prodelphinidins |              |            |       | 0  | 1373 | 4174 | 3456 |
| GG                    | C30 H26 O14  | 610.13302  | 6.17  | ND | 16   | 82   | 35   |
| GG                    | C30 H26 O14  | 610.13303  | 8.24  | ND | 182  | 383  | 176  |
| GG                    | C30 H26 O14  | 610.13304  | 4.82  | ND | 38   | 139  | 95   |
| GG                    | C30 H26 O14  | 610.13321  | 6.48  | ND | 110  | 341  | 233  |
| GG-deoxyhexoside      | C33 H40 O20  | 756.21216  | 13.14 | ND | ND   | ND   | ND   |
| GGG                   | C45 H38 O21  | 914.1916   | 7.72  | ND | 26   | 100  | 8    |
| GGG                   | C45 H38 O21  | 914.19169  | 6.63  | ND | 97   | 178  | 127  |
| GGG                   | C45 H38 O21  | 914.19184  | 4.37  | ND | 25   | 36   | 27   |
| GGG                   | C45 H38 O21  | 914.19192  | 7.82  | ND | 52   | 100  | 39   |
| GGGG                  | C60 H50 O28  | 1218.2508  | 7.33  | ND | 3    | 23   | 2    |
| GGGG                  | C60 H50 O28  | 1218.25088 | 9.58  | ND | 7    | 11   | 5    |
| GGGGG                 | C75 H62 O35  | 1522.3086  | 10.05 | ND | 34   | 4    | 3    |

|                                                                |              |            |      |    |     |      |     |
|----------------------------------------------------------------|--------------|------------|------|----|-----|------|-----|
| GGGGG                                                          | C75 H62 O35  | 1522.30948 | 7.66 | ND | 11  | 4    | 5   |
| GGGGGG                                                         | C90 H74 O42  | 1826.36757 | 8.90 | ND | 19  | 5    | 4   |
| GGGGGGG                                                        | C105 H86 O49 | 2130.43022 | 9.17 | ND | 15  | 2    | 1   |
| "G"-prodelphinidins                                            |              |            |      | 0  | 635 | 1408 | 760 |
| Delphinidin 3-O-(2-O-β-d-Glucopyranosyl-α-l-arabinopyranoside) | C26 H28 O16  | 596.13879  | 6.68 | ND | ND  | ND   | ND  |
| Anthocyanins                                                   |              |            |      | 0  | 0   | 0    | 0   |

## Figures

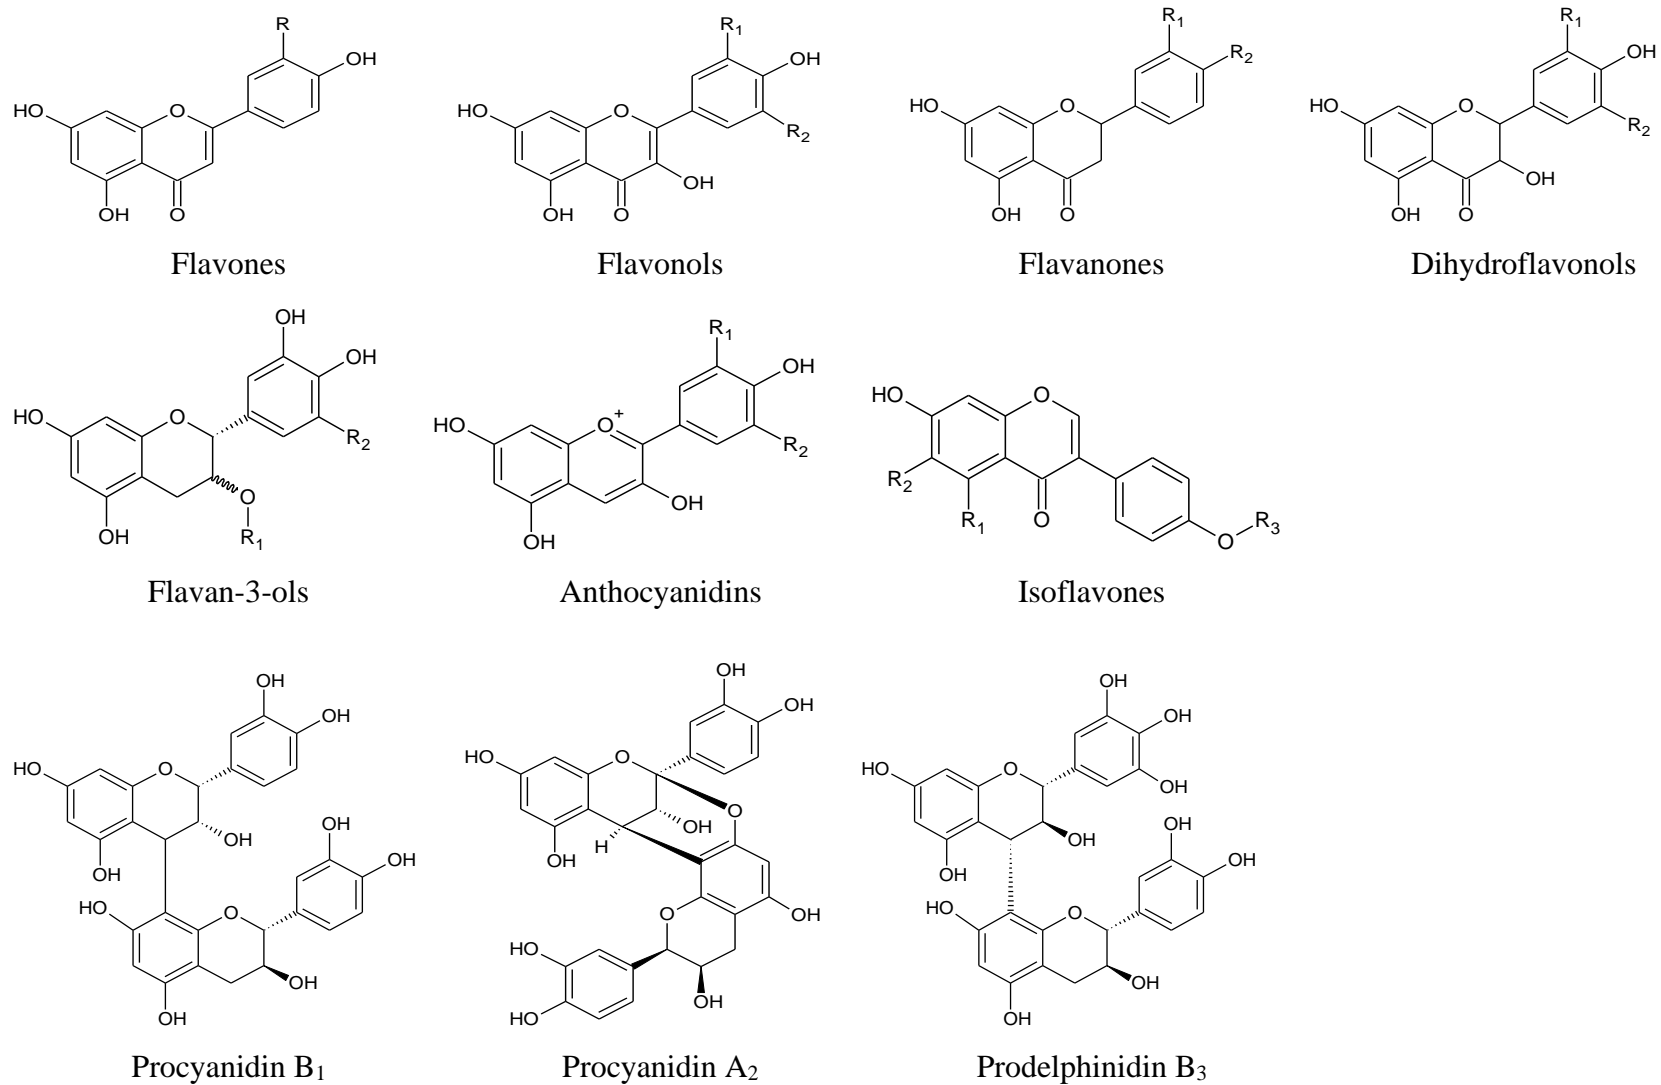

**Figure S1.** General structure of monomeric and examples of polymeric flavonoids

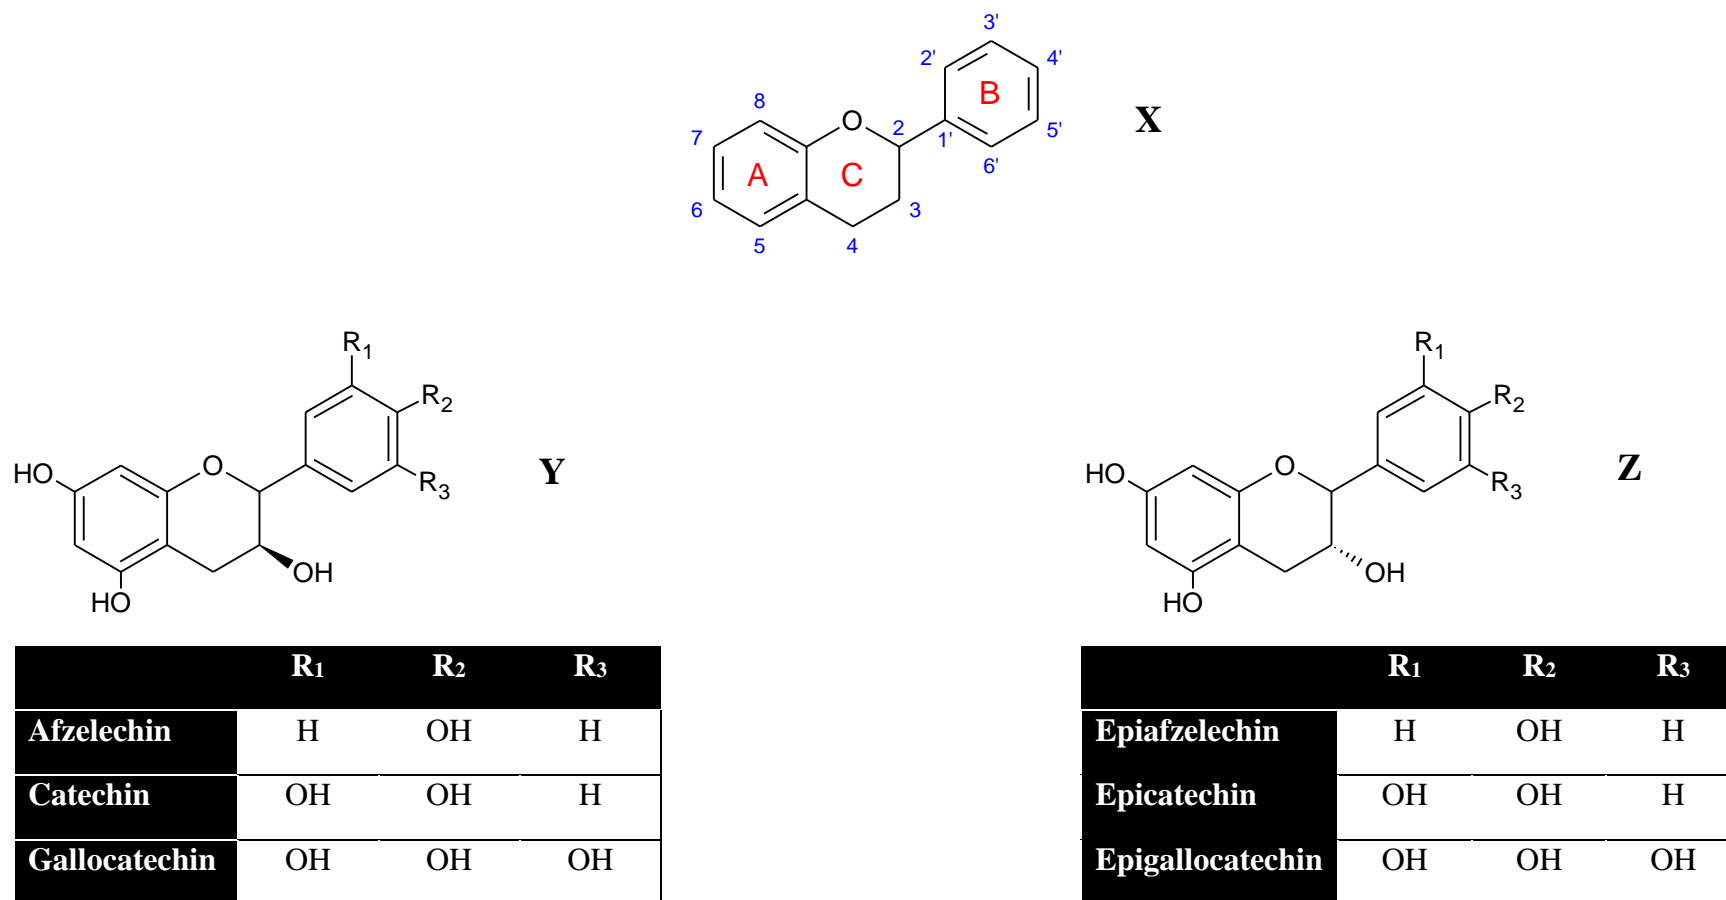

**Figure S2.** Basic structure of flavonoid rings (X), and flavan-3-ol monomers (Y and Z) that polymerize to form different types of proanthocyanidin polymers



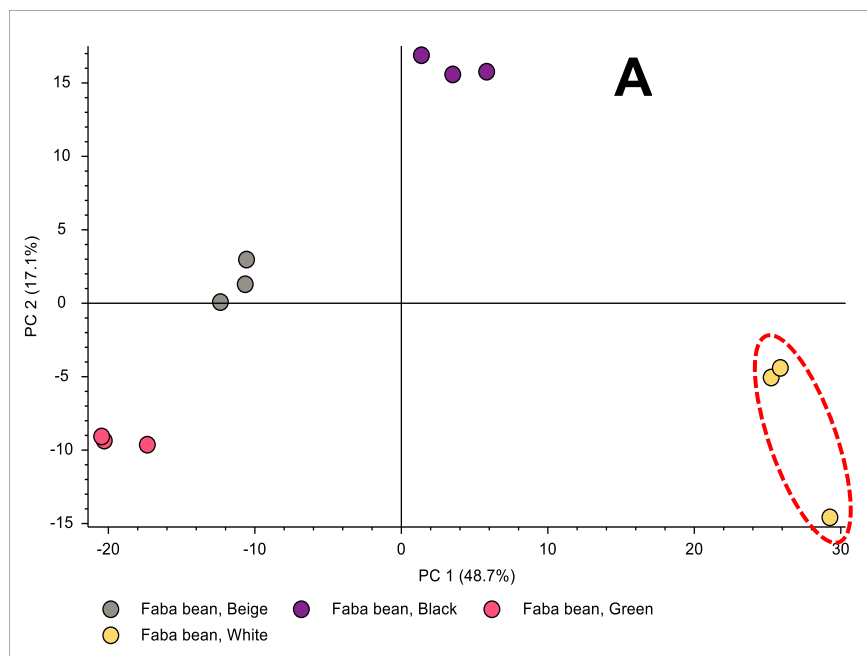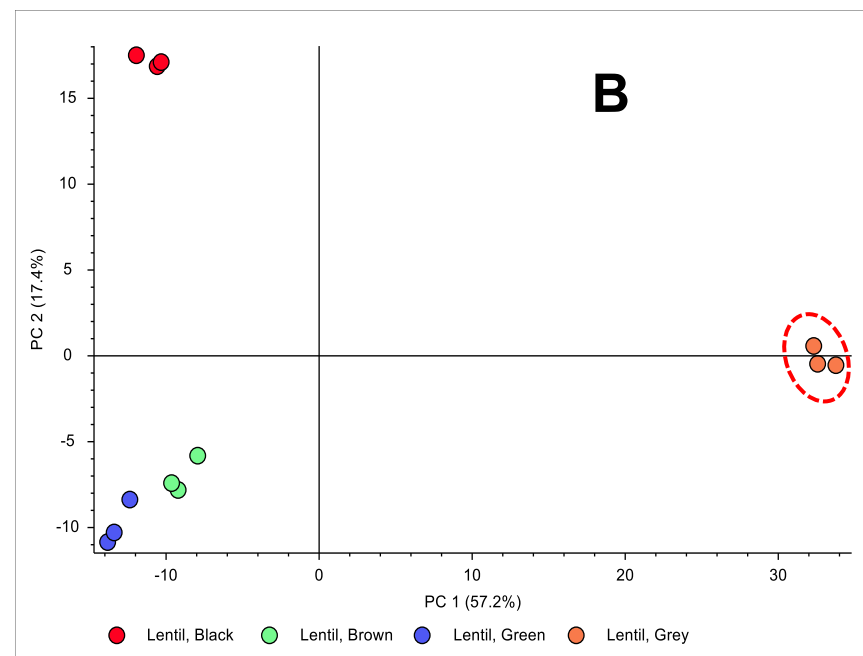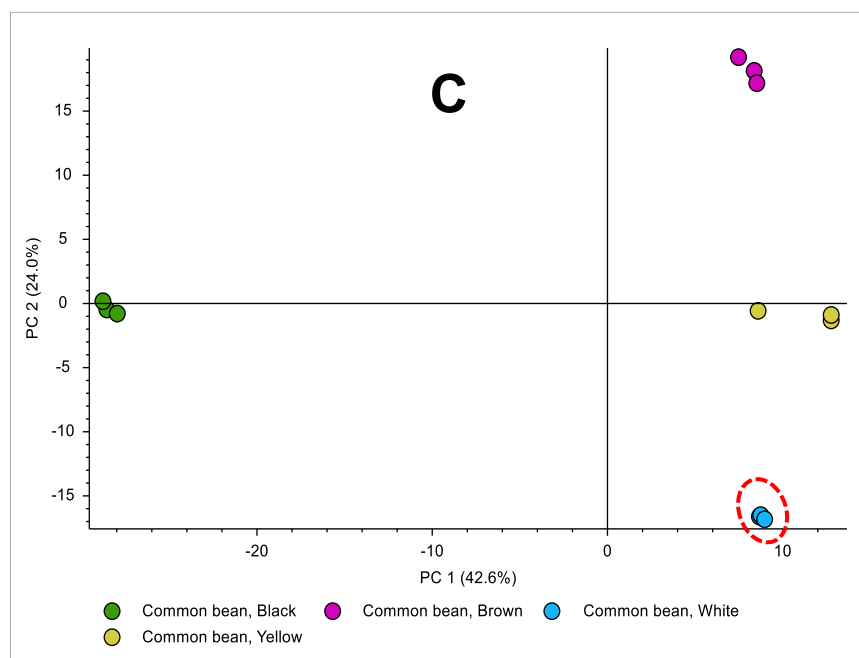

**Figure S3.** A Principal component analysis (PCA) plot of PC1 versus PC2 of faba bean (**A**), lentil (**B**) and common bean (**C**) seed coats. Dotted red circles refer to the low tannin genotypes.

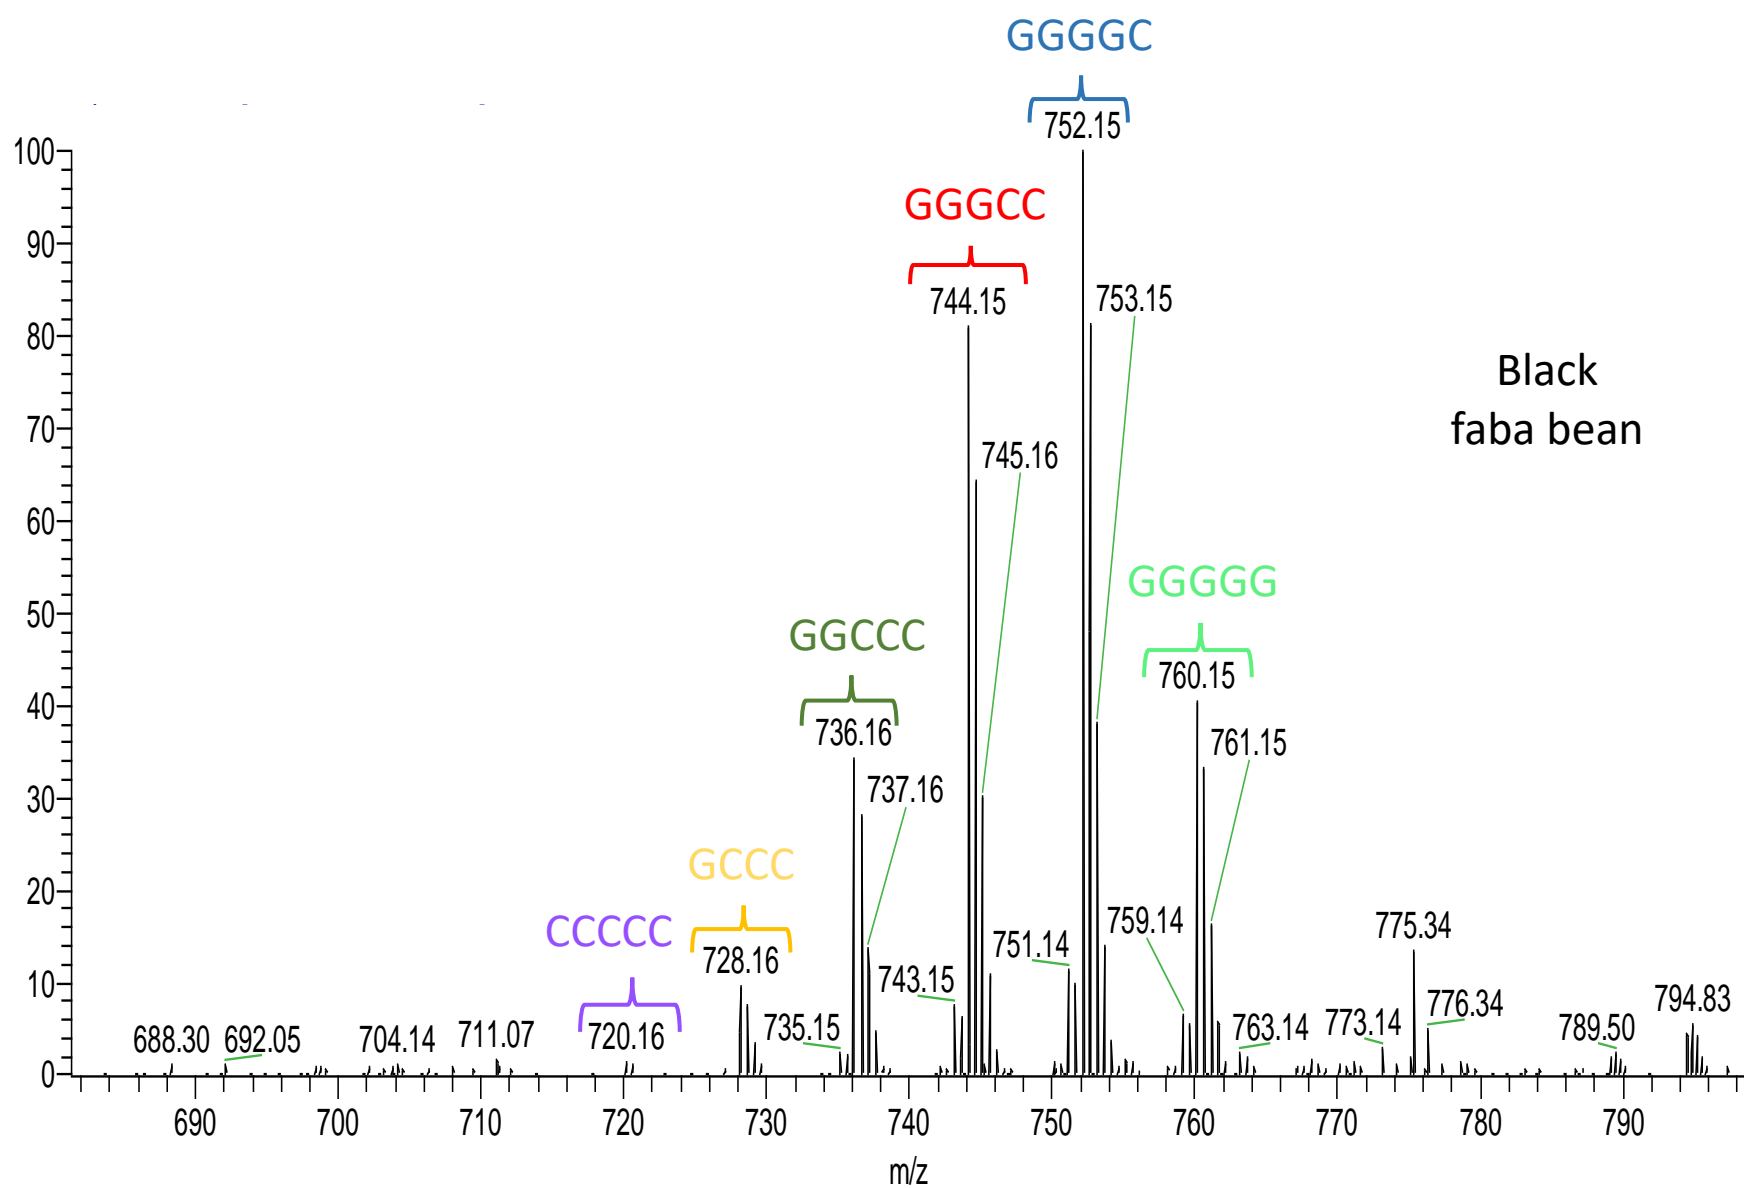

**Figure S4.** HRMS full scan showing a procyanin pentamer and different prodelphinidin pentamers detected in faba bean seed coats
